# Supplementary material
Source: PubMed Central journal article supplement (PMC4817696)
Supplement: ismej2014193x1.pdf [file ismej2014193x1.pdf]

**Inter-phylum HGT has shaped the metabolism of many mesophilic and  
anaerobic bacteria**

Alejandro Caro-Quintero and Konstantinos T. Konstantinidis

**Supplementary Material**

## MATERIALS AND METHODS (DETAILED DESCRIPTION)

**Amino acid and genome sequences used in this study.** Predicted proteins from completed bacterial and archaeal genome projects were downloaded from NCBI on July 1, 2012 (2,001 genomes) to form an in-house searchable database. To avoid the effect of genome reduction in endosymbiotic organisms, which can bias comparisons of the magnitude of HGT across genomes, only free-living genomes with genome size larger than 2 Mbp were used in the analysis (1,356 genomes). The resulting set of genomes represented 28 phyla. Literature review was performed to identify physiological and ecological information for each genome, i.e., source of isolation, optimal growth temperature, and oxygen tolerance.

**Homolog identification and database normalization.** Orthologous genes for all possible pairs of genomes (1,838,736 pairs) were identified using the reciprocal best match approach (Wolf and Koonin 2012) and the USEARCH algorithm for its computational efficiency (Edgar 2010). Only best matches with identity higher than 40% and coverage of the query gene sequence higher than 70% were used in the analysis. For any pair of genomes, the gAAI value was calculated by averaging the identity of shared orthologs as suggested previously (Konstantinidis and Tiedje 2005). In order to reduce the redundancy (and thus, the size) of the database for faster computations, genomes were clustered in groups that shared higher than 95% gAAI, which corresponds to the frequently used standards to define bacterial species (Konstantinidis and Tiedje 2005). One genome from each of the resulting groups (n=879) was randomly selected to

1 represent the group, and the gAAI values between the representative genomes were used  
2 to estimate the genetic divergence between the groups.

3

4 **Quantifying HGT at the genome-level.** For each genome triplet, two percentages were  
5 calculated (best-match ratios; see also main text and Fig. 1B): one for reference protein  
6 sequences that had a homolog in both the insider and outsider genomes (shared genes),  
7 and one for protein sequences with a homolog in either or both the insider and outsider  
8 genomes (all genes). The percentages were grouped by the genetic relatedness of the two  
9 genomes of the same phylum, i.e., triplets with gAAI values within  $\pm 1\%$  of a chosen  
10 gAAI value were grouped together. For each resulting group, the distribution of the  
11 percentages were normalized by standardization and fitted to a Gaussian distribution. P-  
12 values were calculated from this null distribution for each percentage, corrected for  
13 multiple testing using False Discovery Rate (FDR) statistic (Benjamini and Hochberg  
14 1995, Shaffer 1995), and used to identify outliers (q-value threshold 0.005) in terms of  
15 high best-match ratio, representing cases of extreme inter-phylum HGT between the  
16 reference and the outsider genomes. Note that the HGT events detected by this analysis  
17 included both recent and ancestral events because all genes with a better match in the  
18 outsider relative to the insider (for shared genes) or no match in the insider were  
19 considered as horizontally transferred genes, independent of the identity of the match.  
20 Further, the effect of genetic divergence on the number of best-matches (e.g., Fig. 1B)  
21 and hence, on our conclusions, was presumably insignificant as only genomes with  
22 similar gAAI values were compared. All statistical analyses were performed using

1 MATLAB and the Statistics Toolbox, Release 2012b (MathWorks, Inc.; Natick, MA,  
2 USA).

3

4 **Quantifying HGT at the gene level.** Homologous protein-coding genes shared between  
5 the reference and outsider genomes were evaluated statistically to identify cases of HGT  
6 and determine the functional categories that are more commonly transferred across phyla.  
7 Two different statistical approaches were employed; one for homologs present in all  
8 genomes of the triplet (shared genes), and one for homologs only shared by the reference  
9 and outsider genomes (non-shared genes).

10 For shared genes, all homologs were grouped in sets based on the gAAI values ( $\pm$   
11 1%) of the corresponding triplets (gAAI between the reference and insider genomes; see  
12 above). For each set, the amino acid sequence identity between the reference and outsider  
13 homologs was subtracted from the identity between the reference and insider homolog (%  
14 identity with the insider - % identity with the outsider), and a distribution of the resulting  
15 numerical difference values was obtained. Therefore, one such distribution was  
16 calculated for triplets with the similar gAAI values based on all shared genes between the  
17 genomes in the triplets. Each distribution was fitted to a normal, polynomial, or gamma  
18 function and the function with the best fit to the observed distribution (Kruskal-Wallis  
19 test) was selected. The best function was the gamma for gAAI values ranging between  
20 60-94% and the polynomial for 50-60% gAAI; hence, the gamma was preferred for the  
21 remaining analysis. The parameters of the gamma function were extracted and used to  
22 produce one general model for all genes and all gAAIs. This model described the  
23 expected probability of finding a homolog shared between the reference and outsider

1 genomes with a specific amino acid sequence identity value. p-values were estimated  
2 from the cumulative density distribution of the model (1 – model; Fig. S2A) and the  
3 effect of multiple testing was accounted for using the FDR. HGT events were defined as  
4 cases where matches to the outsider had significantly higher identity compared to  
5 matches to the insider (p-value < 0.0001 and q-value < 0.005).

6 For non-shared homologs, a different approach was used to distinguish cases of  
7 HGT from gene loss in the lineages of the insider genome. The approach was based on  
8 the assumption that the majority of fixed mutations among orthologs reflect vertical  
9 descent (Wolf and Koonin 2012), and therefore the variation in amino acid sequence  
10 identities among orthologs can be used as a null model to identify cases with sequence  
11 identity higher than expected due to HGT. Orthologs from different phyla were assigned,  
12 when possible, to the Cluster of Orthologous Groups (COGs), and the mean and standard  
13 deviation of the distribution of amino acid sequence identities between orthologs of the  
14 reference against the outsider (i.e., inter-phylum identity) were calculated for each COG.  
15 These values were used to statistically evaluate if the identity of the match(es) against the  
16 outsider genome was higher than expected by vertical descent and hence, attributable to  
17 HGT. A high stringency threshold (q-value threshold 0.005) was used to identify cases of  
18 HGT (Fig. S2B). Note that, contrary to shared-genes where a single model was used for  
19 all genes, the approach for non-shared genes employed a unique distribution (model) for  
20 each COG, accounting for the different degree of sequence conservation of genes (e.g.,  
21 ribosomal protein-coding genes tend to be more conserved than metabolic ones). For  
22 genes with matches below the threshold in multiple genomes of the lineage that the

1 outsider or insider genomes were assigned to, only the case with the highest identity was  
2 counted to avoid overestimating the frequency of the transferred function.

3

4 **Networks of HGT.** All pairs of genomes (donor and recipient) with significant signal of  
5 exchange were linked in networks that represented the extent of HGT. Networks were  
6 constructed using the Cytoscape V 2.8 software (Smoot et al 2011). Two networks were  
7 evaluated; one based on the whole-genome level analysis, to identify genomes that have  
8 undergone extreme HGT, and another based on the individual gene-level analysis, to find  
9 the most frequently transferred individual functions. Both HGT networks were analyzed  
10 using the Girvan-Newman greedy algorithm (Clauset et al 2004, Newman and Girvan  
11 2004) as implemented in GLaY (Su et al 2010). This algorithm clusters the genomes into  
12 subnetworks that maximize the amount of connectivity (representing number of HGT  
13 events in this case).

14 To assess the level of enrichment of functional (e.g., type of respiration) or  
15 ecological (e.g., habitat of isolation) categories in the subnetworks against the expected  
16 distribution based on the abundance of each category in the complete dataset (i.e., prior to  
17 network analysis), the following approach was used. 1,000 replicate datasets were drawn,  
18 at random, from the complete dataset of all HGT events detected among all genomes  
19 from different phyla using the same number of genomes (556 and 810 genomes for the  
20 genome and gene level analyses, respectively) and the same number of HGT events as  
21 within each network. The abundance of categories in each replicate dataset (e.g.,  
22 frequency of HGT events between a soil and a freshwater genome for assessing the effect  
23 of place of isolation) was quantified and a distribution was obtained based on these

1 abundance values. The probability that the observed enrichment value from the  
2 subnetwork belonged to the latter distribution (p-value) was calculated by the Z-score  
3 test, using the one-tailed distribution.

4

5 **Phylogenetic reconstruction.** The phylogeny of 879 representative genomes was  
6 reconstructed using a similarity matrix built from the AAI values and the Neighbor  
7 Joining algorithm with 1000 bootstraps. Phylogenetic trees were visualized in Cytoscape  
8 V2.8 (Smoot et al 2011) and the putative partners of exchange were connected using an  
9 in-house Perl script. The resulting graph is shown in Figure 2, in which the lines  
10 representing the tree branches were removed for simplicity.

## SUPPLEMENTARY FIGURES

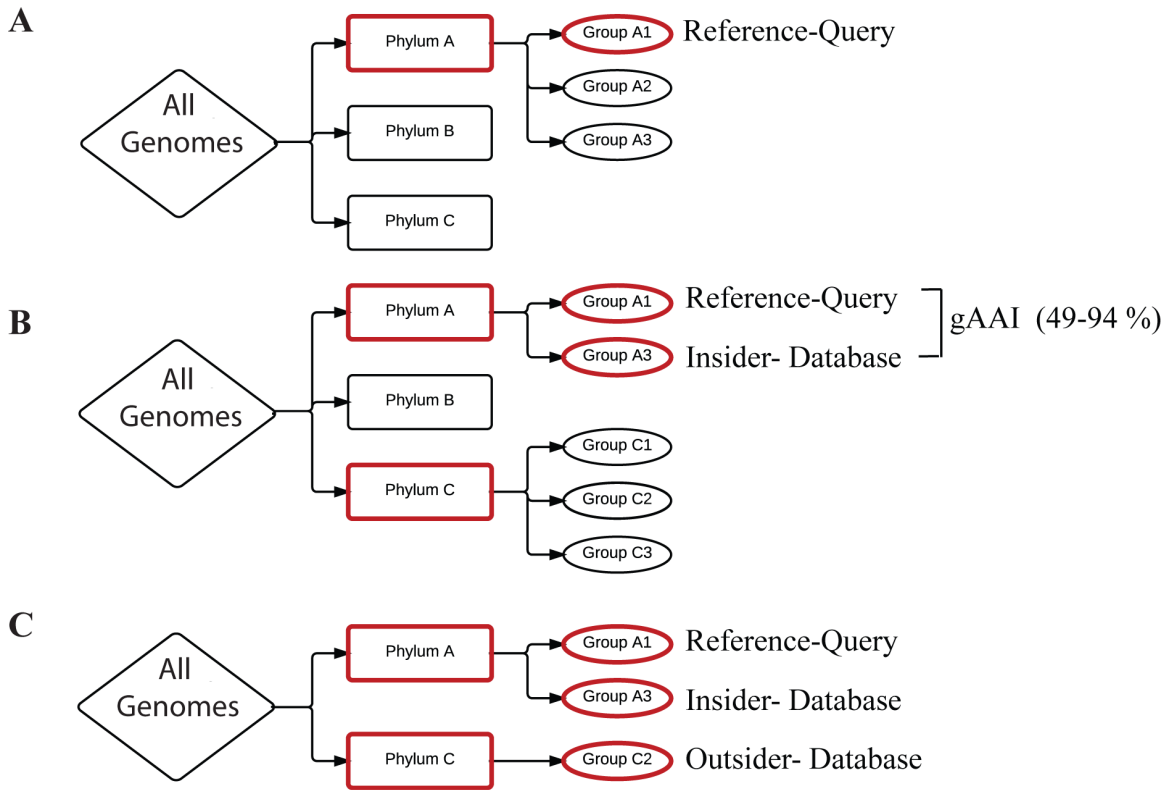

**Figure S1. A schematic of the approach used to select genome triplets for assessing HGT between bacterial and archaeal phyla.** The approach included the following steps: 1) randomly select a reference genome to begin to form a triplet of genomes (**Panel A**); 2) select a second genome (“insider”) representing the same phylum as the reference but from a different group based on gAAI (**Panel B**); and finally, 3) select a genome representing a different phylum (“outsider”) (**Panel C**). The phylogenetic distance between the reference and insider genomes was measured by gAAI; all triplets characterized by similar gAAI values between the reference and insider genomes ( $\pm 1\%$  from the chosen gAAI values) formed a single set and were analyzed together (compared).



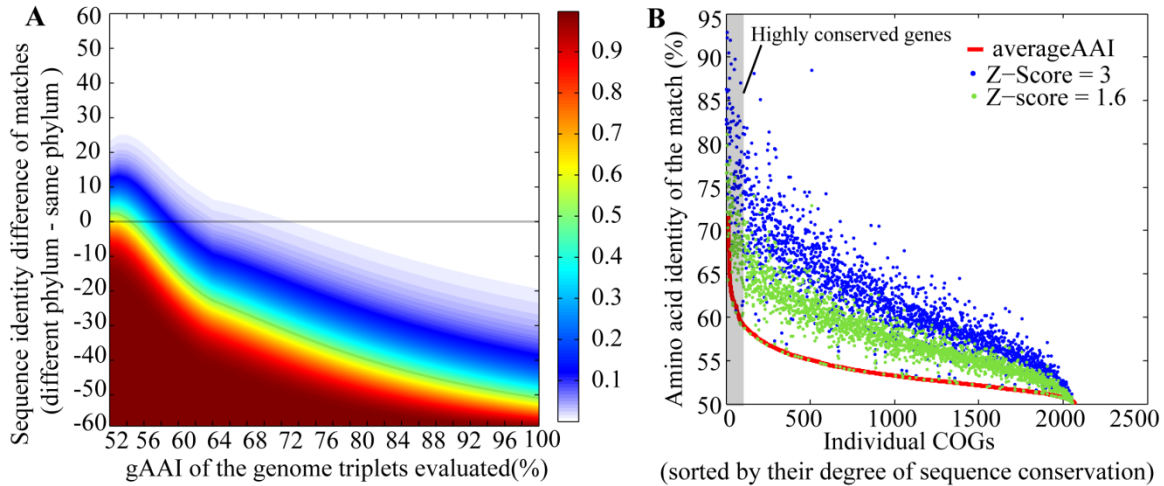

**Figure S2. Identification of genes exchanged between bacterial and archaeal phyla with statistical confidence.** Two different approaches were developed to evaluate the HGT signal for shared (reference gene has homologs in the two other genomes of a triplet) and non-shared genes (reference gene has homologs only in the outsider). For shared genes, a probabilistic model based on the distribution of amino acid sequence identity difference between the reference-insider match relative to the reference-outsider match was used to detect higher than expected identity of the reference genes with the outsider, which were identified as HGT events (see Material and Methods for details; **Panel A**). For non-shared genes, the distribution of sequence identities was based on homologs from all genomes that showed similar gAAI to the reference-outsider pair assigned to the same (individual) COG (**Panel B**). The plot shows the average amino acid identity between the homologs for each COG (red line), green dots represent 1.6 standard deviations from the average, and blue dots represent 3 standard deviations from the average. The latter threshold was used to identify HGT events (after correcting it for multiple testing).

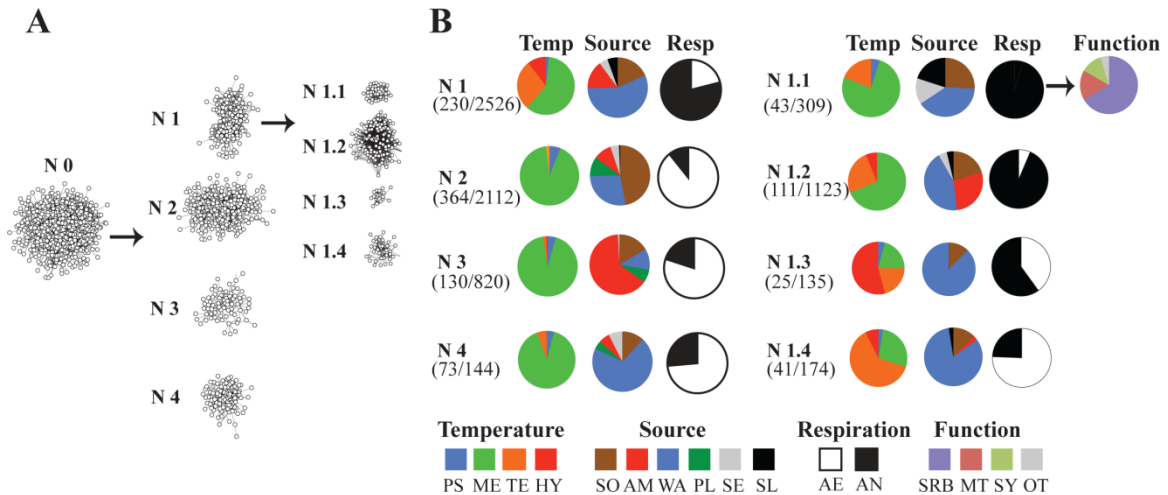

**Figure S3. The effect of shared physiology and ecology on the structure of HGT networks.** A network representing all inter-phylum HGT events was obtained as described in the main text and was divided into subnetworks using the community-clustering algorithm (GLaY) (Clauset et al 2004, Newman and Girvan 2004) that maximizes the connectivity between network nodes. Four subnetworks were obtained at the genome level analysis (N1, N2, N3, N4). Subnetwork N1 encompassed the highest number of anaerobic representatives and was further subdivided using GLaY. Four subnetworks were obtained (N1.1, N1.2, N1.3, N1.4; **Panel A**). The optimal growth temperature (Temp), source of isolation (Source) and type of respiration (Resp), was extracted from the literature for all genomes in each subnetwork (**Panel B**) and categorized as follows: I) for optimal growth temperature category: psychrophilic (PS), mesophilic (ME), thermophilic (TE), and hyperthermophilic (HY). II) For source of isolation: soil (SO), animal associated (AM), aquatic (WA), plant (PL), sediment (SE), and sludge-bioreactor (SL); III) for respiration: aerobic (AE) and anaerobic (AN). The data revealed that the organisms grouped in network N1.1 had predominantly syntrophic interactions among themselves and were categorized further by their metabolic function (Function) to sulfate reducing bacteria (SRB), methanogens (MT), general syntrophic-secondary fermenting bacteria (SY) or other functions (OT). Note that respiration type separates more clearly subnetwork N1 from N2, N3 and N4 than the other categories evaluated. Also the subdivision of N1 creates two subnetworks that largely encompass syntrophic (N1.1) and fermentative organisms (N1.2).

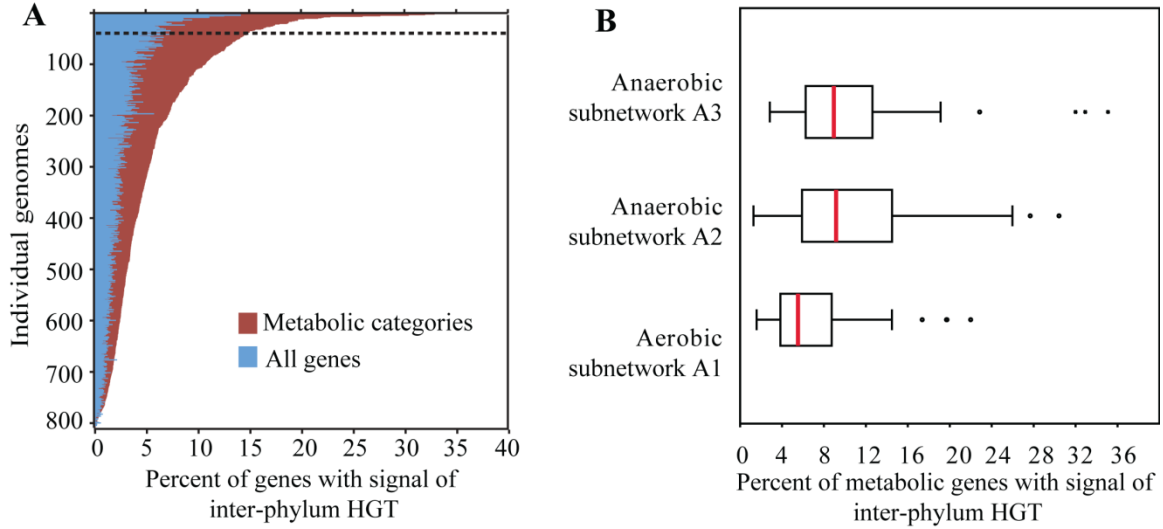

**Figure S4. Frequency of inter-phyllum HGT per genome and gene.** Each bar represents one genome; the red portions of the bar represent the proportion of metabolic genes exchanged (i.e., the number of metabolic genes exchanged divided by the total number of metabolic genes in the genome); the blue portion represents the proportion of all genes exchanged (e.g., the number of genes exchanged divided by the total number of genes in the genome). Genomes are sorted by the percentage of genes exchanged. The dashed line represents the *Sphaerochaeta-Clostridia* case reported previously (Caro-Quintero et al 2012) (**Panel A**). The box plots represent the distribution of the percentages of metabolic genes exchanged for each genome triplet grouped by subnetwork (gene-level analysis; **Panel B**). The red line denotes the median, the left and right box boundaries represent the lower and upper quartiles and the whisker delimit the 97% percentile of the data, dots represent outliers. Note that the median of anaerobic networks A2 and A3 is almost twice as high as that of aerobic network A1.

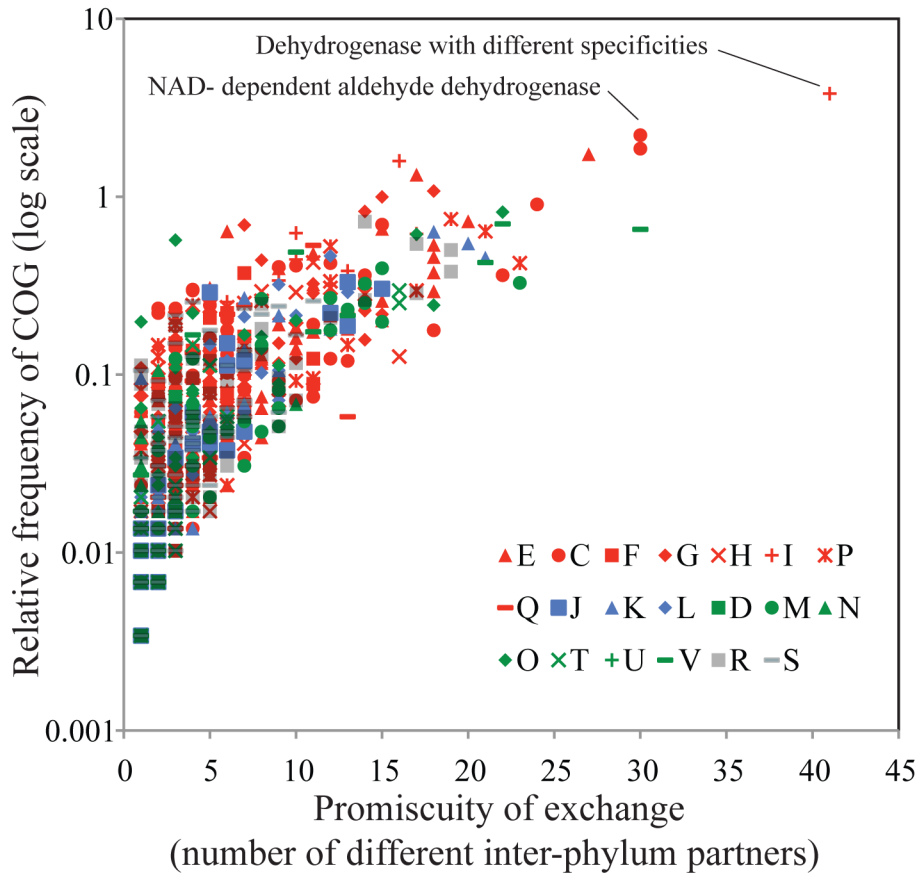

**Figure S5. Relationship between frequency of HGT and promiscuity.** All exchanged genes ( $q$ -value  $< 0.005$ ) were assigned to an individual COG and the relative abundance of the COG (y-axis) is plotted against the number of different phyla partners (promiscuity) that exchanged the genes assigned to the COG (x-axis). Red symbols represent metabolic categories, green symbols represent cellular processes and signaling, blue symbols represent informational storage and processing, and gray symbols represent poorly characterized functions. Note that the higher the frequency of exchange, the higher usually the promiscuity of the exchanged (i.e., more different genomes exchanged the corresponding genes/COG). For instance, the "NAD-dependent aldehyde dehydrogenase" one of the most transferred categories has been exchanged across 30 different pairs of phyla. For the annotation of the letter of each COG functional category, please see Table S10.

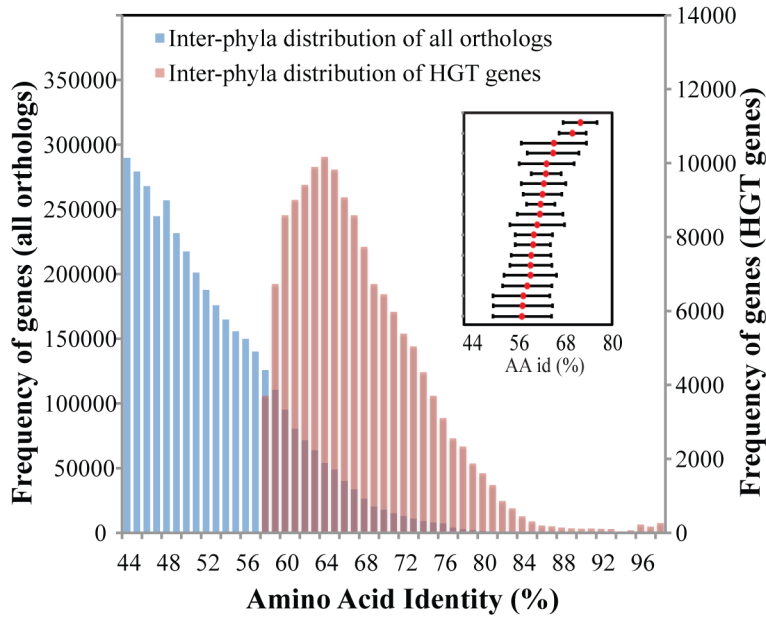

**Figure S6. Assessing the effect of un-equal substitution rates in detecting HGT.** The graph represents the distribution of amino acid identities of all shared orthologs not detected as horizontally transferred (blue columns) and all genes detected as transferred (red columns) between the reference and the outsider genomes for triplets with 58% gAAI between the reference and the insider genomes. The inset shows the inter-phyla average amino acid identity of the 20 most highly conserved orthologs in terms of their degree of sequence conservation and the error bars represent 1.6 standard deviations from the average. Note that the identity of transferred genes is equal or higher than that of highly conserved orthologs, which suggests that un-equal substitution rates in the insider genomes do not likely account for a substantial part of the HGT patterns observed (see also main text for more details).

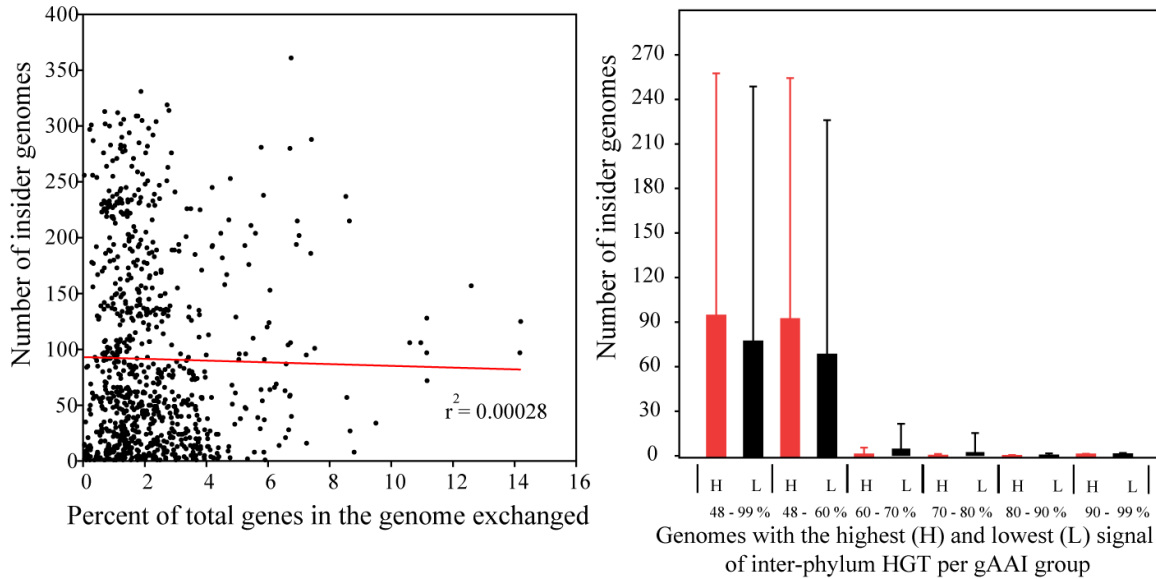

**Figure S7. The influence of the number of insider genomes for each phylum on the number of genes exchanged between phyla.** The correlation between the number of insider genomes and the percentage of the total genes in the reference genome with a signal of inter-phylum horizontal transfer was assessed based on all available genomes (Panel A). The statistical significance of the correlation, evaluated using parametric (Pearson's  $r^2 = 0.00028$ ; shown on the graph) and non-parametric methods (Kendall's  $p$ -value = 0.293, Spearman's  $p$ -value = 0.331), was not significant. The average and standard deviation of the number of insider genomes for the 100 genomes with the highest (H) and lowest (L) percentage of exchanged genes were also not significantly different ( $p$ -value > 0.1; Panel B) for insider genomes of varied gAAI to the reference genome. These results suggested that most cases of extensive inter-phylum HGT were not attributable to fewer or more divergent insider genomes in the phylum of the reference genome (hence, higher chance for having a best-match in the outsider genome) relative to phyla/taxa with low frequency of HGT but represent real HGT events. These results were consistent with our expectations given that the probabilistic models used in the detection of transferred genes (e.g., Fig. 1) are independent of the number of representatives (insider genomes used).

## SUPPLEMENTARY TABLES

**Table S1. The significance (or level of enrichment) of isolation source in the frequency of inter-phylum HGT as detected by the genome level approach.** The genome-level network was based on a total of 11,808 HGT events detected among 556 genomes, and the observed values (5<sup>th</sup> column) were calculated using the frequency of the categories (1<sup>st</sup> and 2<sup>nd</sup> columns) that the genomes, which participated in the subset of these HGT events grouped under each subnetwork, were assigned to.

| Reference                      | Outsider                       | Expected average | Expected standard deviation | Observed | Z-score | p-value |
|--------------------------------|--------------------------------|------------------|-----------------------------|----------|---------|---------|
| soil                           | soil                           | 971.5            | 11.2                        | 1165     | 17.2    | ***+    |
| mammal                         | mammal                         | 276.1            | 16.7                        | 549      | 16.3    | ***+    |
| insects                        | mammal                         | 8.8              | 3.3                         | 56       | 14.2    | ***+    |
| sediment                       | sludge-waste_water-bioreactors | 23.0             | 5.3                         | 95       | 13.6    | ***+    |
| sediment                       | fresh_water                    | 200.9            | 14.3                        | 388      | 13.1    | ***+    |
| sludge-waste_water-bioreactors | sludge-waste_water-bioreactors | 11.5             | 3.8                         | 60       | 12.9    | ***+    |
| sludge-waste_water-bioreactors | fresh_water                    | 101.1            | 10.9                        | 236      | 12.4    | ***+    |
| sediment                       | sediment                       | 44.2             | 7.0                         | 119      | 10.6    | ***+    |
| soil                           | plant                          | 215.0            | 15.3                        | 375      | 10.5    | ***+    |
| soil                           | sludge-waste_water-bioreactors | 105.6            | 11.2                        | 209      | 9.2     | ***+    |
| sludge-waste_water-bioreactors | sediment                       | 22.3             | 4.9                         | 67       | 9.1     | ***+    |
| fresh_water                    | sludge-waste_water-bioreactors | 92.6             | 10.2                        | 172      | 7.8     | ***+    |
| plant                          | plant                          | 40.6             | 6.9                         | 82       | 6.0     | ***+    |
| insects                        | soil                           | 14.9             | 4.1                         | 36       | 5.2     | ***+    |
| fresh_water                    | fresh_water                    | 788.6            | 27.7                        | 922      | 4.8     | ***+    |
| marine                         | sludge-waste_water-bioreactors | 46.7             | 7.1                         | 79       | 4.5     | ***+    |
| insects                        | sludge-waste_water-bioreactors | 2.1              | 1.1                         | 7        | 4.3     | ***+    |
| sediment                       | marine                         | 105.6            | 10.9                        | 151      | 4.2     | ***+    |
| insects                        | sediment                       | 2.8              | 1.5                         | 9        | 4.1     | ***+    |
| marine                         | sediment                       | 89.0             | 9.8                         | 128      | 4.0     | ***+    |
| sludge-waste_water-bioreactors | marine                         | 53.9             | 7.8                         | 79       | 3.2     | **+     |
| soil                           | mammal                         | 538.5            | 23.0                        | 611      | 3.2     | **+     |
| fresh_water                    | sediment                       | 180.0            | 13.7                        | 223      | 3.1     | **+     |
| soil                           | fresh_water                    | 903.2            | 29.5                        | 994      | 3.1     | **+     |
| mammal                         | sludge-waste_water-bioreactors | 56.7             | 8.1                         | 80       | 2.9     | *+      |

|                                |                                |       |      |     |       |      |
|--------------------------------|--------------------------------|-------|------|-----|-------|------|
| soil                           | sediment                       | 204.9 | 14.4 | 245 | 2.8   | *+   |
| soil                           | insects                        | 10.0  | 3.3  | 19  | 2.7   | *+   |
| insects                        | fresh_water                    | 13.4  | 4.0  | 24  | 2.7   | *+   |
| plant                          | mammal                         | 151.8 | 13.3 | 184 | 2.4   | *+   |
| marine                         | fresh_water                    | 384.1 | 20.2 | 429 | 2.2   | NS   |
| sediment                       | mammal                         | 123.4 | 11.5 | 146 | 2.0   | NS   |
| sludge-waste_water-bioreactors | soil                           | 111.7 | 11.4 | 134 | 2.0   | NS   |
| sediment                       | soil                           | 219.0 | 15.5 | 245 | 1.7   | NS   |
| insects                        | plant                          | 2.2   | 1.2  | 4   | 1.5   | NS   |
| marine                         | insects                        | 4.5   | 2.2  | 7   | 1.1   | NS   |
| sludge-waste_water-bioreactors | mammal                         | 62.5  | 8.5  | 72  | 1.1   | NS   |
| plant                          | soil                           | 264.7 | 17.4 | 282 | 1.0   | NS   |
| marine                         | marine                         | 189.3 | 14.8 | 198 | 0.6   | NS   |
| plant                          | sludge-waste_water-bioreactors | 27.3  | 5.5  | 30  | 0.5   | NS   |
| mammal                         | insects                        | 5.9   | 2.5  | 6   | 0.0   | NS   |
| insects                        | marine                         | 7.3   | 2.9  | 6   | -0.4  | NS   |
| sludge-waste_water-bioreactors | plant                          | 23.0  | 4.9  | 20  | -0.6  | NS   |
| sludge-waste_water-bioreactors | insects                        | 1.6   | 0.8  | 1   | -0.8  | NS   |
| fresh_water                    | insects                        | 8.7   | 3.1  | 6   | -0.9  | NS   |
| plant                          | insects                        | 1.9   | 1.0  | 1   | -0.9  | NS   |
| sediment                       | insects                        | 2.3   | 1.2  | 1   | -1.0  | NS   |
| fresh_water                    | marine                         | 407.9 | 20.4 | 365 | -2.1  | NS   |
| plant                          | sediment                       | 50.8  | 7.3  | 33  | -2.5  | *-   |
| soil                           | marine                         | 469.4 | 22.1 | 374 | -4.3  | ***- |
| sediment                       | plant                          | 43.0  | 6.7  | 7   | -5.4  | ***- |
| mammal                         | sediment                       | 109.4 | 11.0 | 50  | -5.4  | ***- |
| mammal                         | plant                          | 118.5 | 11.1 | 54  | -5.8  | ***- |
| plant                          | marine                         | 127.1 | 12.2 | 56  | -5.8  | ***- |
| fresh_water                    | plant                          | 191.6 | 14.4 | 88  | -7.2  | ***- |
| marine                         | plant                          | 93.9  | 10.4 | 16  | -7.5  | ***- |
| mammal                         | soil                           | 511.0 | 23.5 | 327 | -7.8  | ***- |
| fresh_water                    | mammal                         | 482.5 | 22.9 | 298 | -8.1  | ***- |
| plant                          | fresh_water                    | 244.4 | 16.3 | 106 | -8.5  | ***- |
| mammal                         | marine                         | 241.4 | 16.4 | 84  | -9.6  | ***- |
| marine                         | mammal                         | 231.6 | 15.9 | 79  | -9.6  | ***- |
| marine                         | soil                           | 425.8 | 21.1 | 206 | -10.4 | ***- |
| fresh_water                    | soil                           | 871.2 | 30.4 | 536 | -11.0 | ***- |
| mammal                         | fresh_water                    | 473.6 | 22.4 | 177 | -13.3 | ***- |

\*\*\* P-value <0.0001, \*\* P-value <0.001, \* P-value <0.01, + higher than expected, - lower than expected



**Table S2. The significance (or level of enrichment) of oxygen tolerance and optimal growth temperature in the frequency of inter-phylum HGT as detected by the genome level approach.** The genome-level network was based on a total of 6,668 HGT events detected among 556 genomes, and the observed values (5<sup>th</sup> column) were calculated using the frequency of the categories (1<sup>st</sup> and 2<sup>nd</sup> columns) that the genomes, which participated in the subset of these HGT events grouped under each subnetwork, were assigned to. The number of HGT events was higher for the isolation source categories (Table S1) compared to the categories shown here because organisms were frequently assigned to multiple isolation sources (i.e., they were not specific to one habitat).

| Reference                               | Outsider                                | Expected average | Expected standard deviation | Observed | Z-score | P-value |
|-----------------------------------------|-----------------------------------------|------------------|-----------------------------|----------|---------|---------|
| anaerobic respiration hyperthermophilic | anaerobic respiration hyperthermophilic | 1.4              | 0.7                         | 62       | 91.3    | ****    |
| anaerobic respiration thermophilic      | anaerobic respiration thermophilic      | 10.2             | 2.0                         | 160      | 75.7    | ****    |
| anaerobic respiration hyperthermophilic | aerobic respiration hyperthermophilic   | 1.3              | 0.6                         | 44       | 72.6    | ****    |
| anaerobic respiration thermophilic      | anaerobic respiration hyperthermophilic | 3.2              | 1.7                         | 90       | 51.6    | ****    |
| aerobic respiration hyperthermophilic   | anaerobic respiration hyperthermophilic | 1.3              | 0.5                         | 23       | 39.9    | ****    |
| anaerobic respiration mesophilic        | anaerobic respiration thermophilic      | 82.6             | 8.8                         | 392      | 35.3    | ****    |
| anaerobic respiration mesophilic        | anaerobic respiration mesophilic        | 455.6            | 20.6                        | 1174     | 34.9    | ****    |
| aerobic respiration thermophilic        | aerobic respiration thermophilic        | 10.9             | 3.3                         | 85       | 22.4    | ****    |
| anaerobic respiration hyperthermophilic | anaerobic respiration thermophilic      | 3.0              | 1.5                         | 32       | 19.5    | ****    |
| aerobic respiration thermophilic        | anaerobic respiration hyperthermophilic | 3.4              | 1.7                         | 31       | 16.1    | ****    |
| anaerobic respiration mesophilic        | aerobic respiration hyperthermophilic   | 24.5             | 5.1                         | 102      | 15.3    | ****    |
| anaerobic respiration thermophilic      | anaerobic respiration mesophilic        | 70.7             | 8.5                         | 180      | 12.9    | ****    |
| aerobic respiration thermophilic        | aerobic respiration hyperthermophilic   | 2.3              | 1.3                         | 17       | 11.7    | ****    |
| aerobic respiration thermophilic        | anaerobic respiration thermophilic      | 11.6             | 3.3                         | 47       | 10.7    | ****    |
| anaerobic respiration thermophilic      | aerobic respiration thermophilic        | 11.9             | 3.5                         | 43       | 8.8     | ****    |
| anaerobic respiration thermophilic      | aerobic respiration hyperthermophilic   | 2.5              | 1.3                         | 14       | 8.8     | ****    |
| aerobic respiration hyperthermophilic   | aerobic respiration thermophilic        | 2.2              | 1.2                         | 12       | 8.4     | ****    |
| anaerobic respiration hyperthermophilic | aerobic respiration thermophilic        | 3.4              | 1.7                         | 14       | 6.4     | ****    |
| aerobic respiration hyperthermophilic   | aerobic respiration hyperthermophilic   | 1.1              | 0.3                         | 3        | 6.2     | ****    |

|                                         |                                         |        |      |      |      |      |
|-----------------------------------------|-----------------------------------------|--------|------|------|------|------|
| aerobic respiration mesophilic          | aerobic respiration mesophilic          | 2112.3 | 37.8 | 2338 | 6.0  | ***+ |
| anaerobic respiration mesophilic        | aerobic respiration hyperthermophilic   | 15.6   | 3.9  | 27   | 2.9  | *+   |
| anaerobic respiration mesophilic        | anaerobic respiration psychrophilic     | 21.5   | 4.6  | 29   | 1.6  | NS   |
| anaerobic respiration thermophilic      | anaerobic respiration psychrophilic     | 4.1    | 2.0  | 6    | 0.9  | NS   |
| aerobic respiration thermophilic        | aerobic respiration mesophilic          | 163.8  | 12.3 | 158  | -0.5 | NS   |
| aerobic respiration hyperthermophilic   | anaerobic respiration thermophilic      | 2.2    | 1.2  | 1    | -1.0 | NS   |
| aerobic respiration psychrophilic       | aerobic respiration hyperthermophilic   | 2.5    | 1.3  | 1    | -1.1 | NS   |
| anaerobic respiration psychrophilic     | aerobic respiration psychrophilic       | 3.4    | 1.7  | 1    | -1.4 | NS   |
| aerobic respiration psychrophilic       | aerobic respiration psychrophilic       | 8.1    | 2.8  | 4    | -1.5 | NS   |
| anaerobic respiration thermophilic      | aerobic respiration psychrophilic       | 9.9    | 3.2  | 5    | -1.6 | NS   |
| anaerobic respiration psychrophilic     | anaerobic respiration hyperthermophilic | 2.2    | 1.2  | 0    | -1.8 | NS   |
| anaerobic respiration hyperthermophilic | anaerobic respiration psychrophilic     | 1.8    | 1.0  | 0    | -1.8 | NS   |
| aerobic respiration psychrophilic       | anaerobic respiration psychrophilic     | 2.8    | 1.5  | 0    | -1.8 | NS   |
| anaerobic respiration hyperthermophilic | aerobic respiration psychrophilic       | 3.1    | 1.6  | 0    | -1.9 | NS   |
| aerobic respiration hyperthermophilic   | aerobic respiration psychrophilic       | 2.0    | 1.0  | 0    | -1.9 | NS   |
| anaerobic respiration psychrophilic     | aerobic respiration hyperthermophilic   | 1.6    | 0.8  | 0    | -1.9 | NS   |
| anaerobic respiration psychrophilic     | aerobic respiration thermophilic        | 5.7    | 2.3  | 1    | -2.0 | NS   |
| anaerobic respiration psychrophilic     | anaerobic respiration psychrophilic     | 1.5    | 0.7  | 0    | -2.0 | NS   |
| anaerobic respiration psychrophilic     | anaerobic respiration thermophilic      | 5.8    | 2.3  | 1    | -2.0 | NS   |
| aerobic respiration thermophilic        | anaerobic respiration psychrophilic     | 3.9    | 1.9  | 0    | -2.1 | NS   |
| aerobic respiration psychrophilic       | anaerobic respiration hyperthermophilic | 3.7    | 1.8  | 0    | -2.1 | NS   |
| aerobic respiration hyperthermophilic   | anaerobic respiration psychrophilic     | 1.4    | 0.6  | 0    | -2.3 | *-   |
| aerobic respiration thermophilic        | aerobic respiration psychrophilic       | 10.0   | 3.3  | 2    | -2.5 | *-   |
| aerobic respiration mesophilic          | anaerobic respiration psychrophilic     | 42.3   | 6.5  | 25   | -2.7 | *-   |
| aerobic respiration mesophilic          | aerobic respiration psychrophilic       | 139.0  | 11.4 | 108  | -2.7 | *-   |
| aerobic respiration mesophilic          | aerobic respiration hyperthermophilic   | 39.7   | 5.9  | 23   | -2.8 | *-   |
| aerobic respiration psychrophilic       | aerobic respiration thermophilic        | 12.5   | 3.7  | 1    | -3.2 | **-  |
| anaerobic respiration hyperthermophilic | anaerobic respiration mesophilic        | 20.2   | 4.4  | 6    | -3.2 | **-  |

|                                            |                                            |        |      |     |      |      |
|--------------------------------------------|--------------------------------------------|--------|------|-----|------|------|
| aerobic respiration<br>psychrophilic       | anaerobic respiration<br>thermophilic      | 12.3   | 3.5  | 0   | -3.5 | **-  |
| anaerobic respiration<br>mesophilic        | aerobic respiration<br>thermophilic        | 83.6   | 9.2  | 51  | -3.5 | **-  |
| aerobic respiration<br>hyperthermophilic   | anaerobic respiration<br>mesophilic        | 12.2   | 3.4  | 0   | -3.6 | **-  |
| aerobic respiration<br>hyperthermophilic   | aerobic respiration<br>mesophilic          | 29.2   | 5.3  | 9   | -3.8 | ***- |
| anaerobic respiration<br>mesophilic        | aerobic respiration<br>psychrophilic       | 60.1   | 7.4  | 30  | -4.1 | ***- |
| anaerobic respiration<br>psychrophilic     | anaerobic respiration<br>mesophilic        | 27.5   | 5.2  | 2   | -4.9 | ***- |
| aerobic respiration<br>thermophilic        | anaerobic respiration<br>mesophilic        | 71.1   | 8.6  | 29  | -4.9 | ***- |
| anaerobic respiration<br>psychrophilic     | aerobic respiration<br>mesophilic          | 50.5   | 7.1  | 8   | -6.0 | ***- |
| aerobic respiration<br>mesophilic          | anaerobic respiration<br>hyperthermophilic | 67.1   | 8.5  | 10  | -6.7 | ***- |
| anaerobic respiration<br>hyperthermophilic | aerobic respiration<br>mesophilic          | 53.0   | 7.5  | 1   | -7.0 | ***- |
| aerobic respiration<br>psychrophilic       | anaerobic respiration<br>mesophilic        | 64.3   | 8.1  | 2   | -7.7 | ***- |
| aerobic respiration<br>mesophilic          | aerobic respiration<br>thermophilic        | 209.4  | 13.9 | 87  | -8.8 | ***- |
| anaerobic respiration<br>thermophilic      | aerobic respiration<br>mesophilic          | 176.5  | 13.1 | 53  | -9.4 | ***- |
| aerobic respiration<br>psychrophilic       | aerobic respiration<br>mesophilic          | 134.5  | 11.5 | 22  | -9.8 | ***- |
| anaerobic respiration<br>mesophilic        | aerobic respiration<br>mesophilic          | 988.4  | 28.9 | 661 | 11.3 | ***- |
| aerobic respiration<br>mesophilic          | anaerobic respiration<br>thermophilic      | 219.3  | 14.9 | 27  | 12.9 | ***- |
| aerobic respiration<br>mesophilic          | anaerobic respiration<br>mesophilic        | 1088.7 | 29.7 | 414 | 22.7 | ***- |

\*\*\* P-value <0.0001, \*\* P-value <0.001, \* P-value <0.01, + higher than expected, - lower than expected

**Table S3. The significance (or level of enrichment) of isolation source in the frequency of inter-phylum HGT as detected by the gene level approach.** The gene-level network was based on a total of 119,635 HGT events detected among 810 genomes, and the observed values (5<sup>th</sup> column) were calculated using the frequency of the categories (1<sup>st</sup> and 2<sup>nd</sup> columns) that the genomes, which participated in the subset of these HGT events grouped under each subnetwork, were assigned to.

| Reference                      | Outsider                       | Expected average | Expected standard deviation | Observed | Z-score | p-value |
|--------------------------------|--------------------------------|------------------|-----------------------------|----------|---------|---------|
| soil                           | soil                           | 8647.9           | 49.9                        | 11690    | 61.0    | ***+    |
| soil                           | fresh_water                    | 8020.8           | 82.7                        | 11680    | 44.2    | ***+    |
| sediment                       | marine                         | 1091.4           | 33.2                        | 2450     | 40.9    | ***+    |
| plant                          | soil                           | 2085.3           | 48.5                        | 3521     | 29.6    | ***+    |
| sediment                       | fresh_water                    | 2014.9           | 49.8                        | 3413     | 28.1    | ***+    |
| soil                           | marine                         | 4367.4           | 62.7                        | 6010     | 26.2    | ***+    |
| plant                          | fresh_water                    | 1886.2           | 48.0                        | 2823     | 19.5    | ***+    |
| sediment                       | sediment                       | 511.6            | 24.1                        | 935      | 17.6    | ***+    |
| fresh_water                    | fresh_water                    | 6951.3           | 89.0                        | 8500     | 17.4    | ***+    |
| fresh_water                    | marine                         | 3786.5           | 63.6                        | 4814     | 16.2    | ***+    |
| soil                           | insects                        | 176.2            | 12.8                        | 360      | 14.4    | ***+    |
| sludge-waste_water-bioreactors | marine                         | 963.4            | 31.0                        | 1372     | 13.2    | ***+    |
| sludge-waste_water-bioreactors | fresh_water                    | 1766.4           | 48.9                        | 2381     | 12.6    | ***+    |
| mammal                         | insects                        | 114.2            | 12.3                        | 244      | 10.6    | ***+    |
| soil                           | sediment                       | 2113.3           | 48.0                        | 2538     | 8.8     | ***+    |
| sediment                       | sludge-waste_water-bioreactors | 467.7            | 20.3                        | 633      | 8.1     | ***+    |
| marine                         | marine                         | 1959.4           | 43.4                        | 2266     | 7.1     | ***+    |
| sludge-waste_water-bioreactors | sediment                       | 457.2            | 20.7                        | 591      | 6.5     | ***+    |
| soil                           | sludge-waste_water-bioreactors | 1873.7           | 49.9                        | 2185     | 6.2     | ***+    |
| sludge-waste_water-bioreactors | sludge-waste_water-bioreactors | 401.9            | 22.9                        | 537      | 5.9     | ***+    |
| sludge-waste_water-bioreactors | insects                        | 38.4             | 6.3                         | 73       | 5.5     | ***+    |
| fresh_water                    | sediment                       | 1844.3           | 47.6                        | 2065     | 4.6     | ***+    |
| mammal                         | mammal                         | 3185.1           | 61.5                        | 3454     | 4.4     | ***+    |
| fresh_water                    | sludge-waste_water-bioreactors | 1643.8           | 43.1                        | 1792     | 3.4     | **+     |
| plant                          | marine                         | 1012.5           | 40.0                        | 1134     | 3.0     | *+      |
| sediment                       | insects                        | 41.6             | 7.0                         | 56       | 2.1     | NS      |
| fresh_water                    | insects                        | 149.5            | 14.8                        | 178      | 1.9     | NS      |
| plant                          | sludge-waste_water-bioreactors | 429.6            | 21.9                        | 467      | 1.7     | NS      |

|                                |                                |        |      |      |       |      |
|--------------------------------|--------------------------------|--------|------|------|-------|------|
| sludge-waste_water-bioreactors | soil                           | 1946.1 | 45.9 | 1973 | 0.6   | NS   |
| insects                        | soil                           | 192.4  | 13.2 | 199  | 0.5   | NS   |
| insects                        | mammal                         | 130.8  | 11.0 | 136  | 0.5   | NS   |
| plant                          | plant                          | 292.8  | 17.1 | 292  | 0.0   | NS   |
| plant                          | insects                        | 33.5   | 6.6  | 31   | -0.4  | NS   |
| sediment                       | soil                           | 2235.8 | 48.5 | 2212 | -0.5  | NS   |
| plant                          | sediment                       | 458.7  | 21.8 | 415  | -2.0  | NS   |
| insects                        | sediment                       | 43.6   | 6.9  | 26   | -2.5  | *-   |
| insects                        | sludge-waste_water-bioreactors | 40.7   | 6.5  | 24   | -2.6  | *-   |
| marine                         | sediment                       | 982.9  | 36.0 | 871  | -3.1  | **-  |
| insects                        | plant                          | 29.4   | 6.2  | 9    | -3.3  | **-  |
| marine                         | insects                        | 77.7   | 9.8  | 43   | -3.5  | **-  |
| insects                        | fresh_water                    | 171.6  | 15.1 | 118  | -3.5  | **-  |
| insects                        | marine                         | 90.9   | 9.9  | 55   | -3.6  | **-  |
| fresh_water                    | soil                           | 7799.2 | 95.1 | 7065 | -7.7  | ***- |
| marine                         | fresh_water                    | 3707.1 | 65.0 | 3194 | -7.9  | ***- |
| sludge-waste_water-bioreactors | mammal                         | 1244.5 | 33.5 | 935  | -9.2  | ***- |
| mammal                         | sludge-waste_water-bioreactors | 1134.4 | 39.2 | 750  | -9.8  | ***- |
| marine                         | sludge-waste_water-bioreactors | 881.0  | 27.3 | 576  | -11.2 | ***- |
| mammal                         | sediment                       | 1302.6 | 37.2 | 864  | -11.8 | ***- |
| sludge-waste_water-bioreactors | plant                          | 369.8  | 19.4 | 136  | -12.1 | ***- |
| soil                           | plant                          | 1716.4 | 43.5 | 1177 | -12.4 | ***- |
| sediment                       | plant                          | 393.3  | 20.4 | 135  | -12.7 | ***- |
| sediment                       | mammal                         | 1453.1 | 37.6 | 926  | -14.0 | ***- |
| mammal                         | marine                         | 2658.7 | 48.5 | 1789 | -17.9 | ***- |
| plant                          | mammal                         | 1439.9 | 39.6 | 663  | -19.6 | ***- |
| mammal                         | soil                           | 5235.2 | 78.6 | 3618 | -20.6 | ***- |
| mammal                         | fresh_water                    | 4833.3 | 75.7 | 3230 | -21.2 | ***- |
| marine                         | plant                          | 789.8  | 28.8 | 170  | -21.5 | ***- |
| fresh_water                    | plant                          | 1506.1 | 43.2 | 548  | -22.2 | ***- |
| mammal                         | plant                          | 1145.4 | 37.5 | 272  | -23.3 | ***- |
| soil                           | mammal                         | 5502.8 | 78.4 | 3592 | -24.4 | ***- |
| marine                         | soil                           | 4158.2 | 58.7 | 2310 | -31.5 | ***- |
| fresh_water                    | mammal                         | 4961.1 | 81.7 | 2310 | -32.5 | ***- |
| marine                         | mammal                         | 2674.2 | 55.1 | 809  | -33.9 | ***- |

\*\*\* P-value <0.0001, \*\* P-value <0.001, \* P-value <0.01, + higher than expected, - lower than expected

**Table S4. The significance (or level of enrichment) of oxygen tolerance and optimal growth temperature in the frequency of inter-phylum HGT as detected by the gene level approach.** The gene-level network was based on a total of 67,951 HGT events detected among 810 genomes, and the observed values (5<sup>th</sup> column) were calculated using the frequency of the categories (1<sup>st</sup> and 2<sup>nd</sup> columns) that the genomes, which participated in the subset of these HGT events grouped under each subnetwork, were assigned to. The number of HGT events was higher for the isolation source categories (Table S1) compared to the categories shown here because organisms were frequently assigned to multiple isolation sources (i.e., they were not specific to one habitat).

| Reference                               | Outsider                                | Expected average | Expected standard deviation | Observed | Z-score | p-value |
|-----------------------------------------|-----------------------------------------|------------------|-----------------------------|----------|---------|---------|
| anaerobic respiration mesophilic        | anaerobic respiration thermophilic      | 972.0            | 32.3                        | 3503     | 78.5    | ***+    |
| anaerobic respiration mesophilic        | anaerobic respiration mesophilic        | 4001.3           | 65.7                        | 8480     | 68.2    | ***+    |
| anaerobic respiration thermophilic      | anaerobic respiration thermophilic      | 157.6            | 12.3                        | 825      | 54.2    | ***+    |
| aerobic respiration mesophilic          | aerobic respiration thermophilic        | 2339.4           | 47.3                        | 4325     | 42.0    | ***+    |
| anaerobic respiration thermophilic      | aerobic respiration thermophilic        | 179.7            | 11.2                        | 566      | 34.4    | ***+    |
| aerobic respiration thermophilic        | aerobic respiration thermophilic        | 138.6            | 11.5                        | 380      | 20.9    | ***+    |
| anaerobic respiration thermophilic      | anaerobic respiration hyperthermophilic | 81.1             | 7.7                         | 240      | 20.7    | ***+    |
| aerobic respiration mesophilic          | aerobic respiration mesophilic          | 20950.9          | 116.4                       | 23266    | 19.9    | ***+    |
| anaerobic respiration mesophilic        | aerobic respiration thermophilic        | 902.7            | 28.9                        | 1444     | 18.8    | ***+    |
| anaerobic respiration thermophilic      | anaerobic respiration mesophilic        | 856.9            | 29.7                        | 1282     | 14.3    | ***+    |
| anaerobic respiration hyperthermophilic | anaerobic respiration hyperthermophilic | 27.2             | 5.4                         | 99       | 13.3    | ***+    |
| anaerobic respiration hyperthermophilic | anaerobic respiration thermophilic      | 72.7             | 8.7                         | 175      | 11.7    | ***+    |
| aerobic respiration hyperthermophilic   | aerobic respiration thermophilic        | 29.1             | 5.6                         | 90       | 10.8    | ***+    |
| anaerobic respiration psychrophilic     | anaerobic respiration thermophilic      | 57.0             | 7.9                         | 88       | 3.9     | ***+    |
| anaerobic respiration psychrophilic     | anaerobic respiration mesophilic        | 199.0            | 16.0                        | 245      | 2.9     | *+      |
| aerobic respiration thermophilic        | anaerobic respiration thermophilic      | 167.7            | 13.9                        | 198      | 2.2     | NS      |
| anaerobic respiration psychrophilic     | aerobic respiration thermophilic        | 51.1             | 7.3                         | 63       | 1.6     | NS      |
| anaerobic respiration hyperthermophilic | aerobic respiration thermophilic        | 70.7             | 8.2                         | 82       | 1.4     | NS      |
| aerobic respiration psychrophilic       | aerobic respiration thermophilic        | 137.8            | 11.2                        | 144      | 0.5     | NS      |
| aerobic respiration                     | anaerobic respiration                   | 152.1            | 13.1                        | 156      | 0.3     | NS      |

| psychrophilic         | thermophilic          |        |      |      |      |      |
|-----------------------|-----------------------|--------|------|------|------|------|
| anaerobic respiration | anaerobic respiration | 4.4    | 1.9  | 2    | -1.3 | NS   |
| psychrophilic         | psychrophilic         |        |      |      |      |      |
| aerobic respiration   | anaerobic respiration | 17.5   | 4.7  | 9    | -1.8 | NS   |
| psychrophilic         | psychrophilic         |        |      |      |      |      |
| anaerobic respiration | aerobic respiration   | 22.0   | 4.7  | 12   | -2.1 | NS   |
| psychrophilic         | psychrophilic         |        |      |      |      |      |
| aerobic respiration   | anaerobic respiration | 570.0  | 21.8 | 520  | -2.3 | NS   |
| psychrophilic         | mesophilic            |        |      |      |      |      |
| aerobic respiration   | aerobic respiration   | 31.3   | 5.1  | 19   | -2.4 | *-   |
| thermophilic          | hyperthermophilic     |        |      |      |      |      |
| anaerobic respiration | aerobic respiration   | 11.0   | 3.5  | 2    | -2.6 | **-  |
| psychrophilic         | hyperthermophilic     |        |      |      |      |      |
| aerobic respiration   | anaerobic respiration | 12.5   | 3.9  | 2    | -2.6 | **-  |
| hyperthermophilic     | hyperthermophilic     |        |      |      |      |      |
| anaerobic respiration | anaerobic respiration | 17.1   | 4.6  | 3    | -3.0 | **-  |
| hyperthermophilic     | psychrophilic         |        |      |      |      |      |
| aerobic respiration   | aerobic respiration   | 67.0   | 8.2  | 39   | -3.4 | **-  |
| psychrophilic         | psychrophilic         |        |      |      |      |      |
| anaerobic respiration | aerobic respiration   | 382.2  | 19.6 | 310  | -3.7 | **-  |
| psychrophilic         | mesophilic            |        |      |      |      |      |
| aerobic respiration   | anaerobic respiration | 33.8   | 5.7  | 12   | -3.8 | ***- |
| hyperthermophilic     | thermophilic          |        |      |      |      |      |
| anaerobic respiration | anaerobic respiration | 41.6   | 6.6  | 16   | -3.9 | ***- |
| thermophilic          | psychrophilic         |        |      |      |      |      |
| aerobic respiration   | aerobic respiration   | 23.1   | 4.9  | 1    | -4.5 | ***- |
| hyperthermophilic     | psychrophilic         |        |      |      |      |      |
| anaerobic respiration | anaerobic respiration | 25.8   | 5.1  | 3    | -4.5 | ***- |
| psychrophilic         | hyperthermophilic     |        |      |      |      |      |
| aerobic respiration   | aerobic respiration   | 30.4   | 5.9  | 2    | -4.8 | ***- |
| psychrophilic         | hyperthermophilic     |        |      |      |      |      |
| aerobic respiration   | anaerobic respiration | 2730.4 | 50.4 | 2464 | -5.3 | ***- |
| mesophilic            | thermophilic          |        |      |      |      |      |
| anaerobic respiration | aerobic respiration   | 38.3   | 6.4  | 3    | -5.5 | ***- |
| thermophilic          | hyperthermophilic     |        |      |      |      |      |
| aerobic respiration   | anaerobic respiration | 36.3   | 5.8  | 4    | -5.6 | ***- |
| thermophilic          | psychrophilic         |        |      |      |      |      |
| aerobic respiration   | aerobic respiration   | 1217.2 | 35.7 | 1001 | -6.1 | ***- |
| psychrophilic         | mesophilic            |        |      |      |      |      |
| aerobic respiration   | anaerobic respiration | 74.0   | 9.1  | 18   | -6.2 | ***- |
| thermophilic          | hyperthermophilic     |        |      |      |      |      |
| anaerobic respiration | anaerobic respiration | 156.4  | 13.0 | 74   | -6.3 | ***- |
| mesophilic            | psychrophilic         |        |      |      |      |      |
| anaerobic respiration | aerobic respiration   | 50.9   | 6.7  | 3    | -7.2 | ***- |
| hyperthermophilic     | psychrophilic         |        |      |      |      |      |
| aerobic respiration   | anaerobic respiration | 68.1   | 8.1  | 3    | -8.0 | ***- |
| psychrophilic         | hyperthermophilic     |        |      |      |      |      |
| aerobic respiration   | aerobic respiration   | 107.8  | 11.1 | 17   | -8.2 | ***- |
| thermophilic          | psychrophilic         |        |      |      |      |      |
| anaerobic respiration | aerobic respiration   | 122.6  | 12.8 | 12   | -8.6 | ***- |
| thermophilic          | psychrophilic         |        |      |      |      |      |
| anaerobic respiration | aerobic respiration   | 198.2  | 13.0 | 86   | -8.7 | ***- |
| mesophilic            | hyperthermophilic     |        |      |      |      |      |
| anaerobic respiration | anaerobic respiration | 357.7  | 20.9 | 150  | -9.9 | ***- |
| hyperthermophilic     | mesophilic            |        |      |      |      |      |

|                                            |                                            |         |      |      |       |      |
|--------------------------------------------|--------------------------------------------|---------|------|------|-------|------|
| anaerobic respiration<br>mesophilic        | anaerobic respiration<br>hyperthermophilic | 438.1   | 20.9 | 219  | -10.5 | ***- |
| aerobic respiration<br>hyperthermophilic   | anaerobic respiration<br>mesophilic        | 161.7   | 12.8 | 22   | -10.9 | ***- |
| aerobic respiration<br>mesophilic          | anaerobic respiration<br>psychrophilic     | 319.9   | 16.0 | 133  | -11.7 | ***- |
| aerobic respiration<br>mesophilic          | aerobic respiration<br>hyperthermophilic   | 541.5   | 21.8 | 263  | -12.7 | ***- |
| aerobic respiration<br>thermophilic        | anaerobic respiration<br>mesophilic        | 760.5   | 25.0 | 427  | -13.3 | ***- |
| anaerobic respiration<br>mesophilic        | aerobic respiration<br>psychrophilic       | 525.4   | 21.7 | 164  | -16.7 | ***- |
| aerobic respiration<br>mesophilic          | anaerobic respiration<br>mesophilic        | 10101.6 | 83.4 | 8708 | -16.7 | ***- |
| aerobic respiration<br>mesophilic          | aerobic respiration<br>psychrophilic       | 1226.1  | 35.7 | 598  | -17.6 | ***- |
| aerobic respiration<br>hyperthermophilic   | aerobic respiration<br>mesophilic          | 408.3   | 19.6 | 43   | -18.7 | ***- |
| aerobic respiration<br>thermophilic        | aerobic respiration<br>mesophilic          | 1822.7  | 43.7 | 630  | -27.3 | ***- |
| aerobic respiration<br>mesophilic          | anaerobic respiration<br>hyperthermophilic | 1204.1  | 35.4 | 166  | -29.4 | ***- |
| anaerobic respiration<br>hyperthermophilic | aerobic respiration<br>mesophilic          | 920.0   | 28.2 | 67   | -30.3 | ***- |
| anaerobic respiration<br>thermophilic      | aerobic respiration<br>mesophilic          | 2247.5  | 46.7 | 701  | -33.1 | ***- |
| anaerobic respiration<br>mesophilic        | aerobic respiration<br>mesophilic          | 9258.8  | 86.7 | 5372 | -44.8 | ***- |
| aerobic respiration<br>hyperthermophilic   | aerobic respiration<br>hyperthermophilic   | 2.4     | 1.3  | 0    | -     | NA   |
| aerobic respiration<br>hyperthermophilic   | anaerobic respiration<br>psychrophilic     | 6.3     | 2.3  | 0    | -     | NA   |
| anaerobic respiration<br>hyperthermophilic | aerobic respiration<br>hyperthermophilic   | 10.2    | 3.1  | 0    | -     | NA   |

\*\*\* P-value <0.0001, \*\* P-value <0.001, \* P-value <0.01, + higher than expected, - lower than expected



**Table S5. Organisms with the highest percentage of genes acquired from organisms of different phyla.** Organisms are ranked by the number of genes with signal of HGT, reported as the fraction of the total genes in the genome.

| Genome name                                                | Optimal growth temperature | Oxygen Tolerance | Metabolic categories (%) | Total genome (%) |
|------------------------------------------------------------|----------------------------|------------------|--------------------------|------------------|
| <i>Ilyobacter polytropus</i> DSM 2926 uid59769             | mesophilic                 | anaerobic        | 35.1                     | 16.2             |
| <i>Leptotrichia buccalis</i> C 1013 b uid59211             | mesophilic                 | anaerobic        | 32.9                     | 11.1             |
| <i>Sebaldella termitidis</i> ATCC 33386 uid41865           | mesophilic                 | Anae`robic       | 32.0                     | 11.0             |
| <i>Desulfurispirillum indicum</i> S5 uid45897              | mesophilic                 | anaerobic        | 30.4                     | 14.2             |
| <i>Thermodesulfatator indicus</i> DSM 15286 uid68285       | thermophilic               | anaerobic        | 27.7                     | 12.6             |
| <i>Deferribacter desulfuricans</i> SSM1 uid46653           | thermophilic               | anaerobic        | 26.0                     | 10.6             |
| <i>Fusobacterium nucleatum</i> ATCC 25586 uid57885         | mesophilic                 | aerobic          | 22.9                     | 11.2             |
| <i>Thermodesulfovibrio yellowstonii</i> DSM 11347 uid59257 | thermophilic               | aerobic          | 22.2                     | 11.2             |
| <i>Candidatus Solibacter usitatus</i> Ellin6076 uid58139   | mesophilic                 | aerobic          | 22.0                     | 5.9              |
| <i>Geobacter sulfurreducens</i> KN400 uid161977            | mesophilic                 | anaerobic        | 21.7                     | 8.6              |
| <i>Candidatus Nitrospira defluvii</i> uid51175             | mesophilic                 | anaerobic        | 20.3                     | 8.7              |
| <i>Thermaerobacter marianensis</i> DSM 12885 uid61727      | hyperthermophilic          | aerobic          | 19.7                     | 8.5              |
| <i>Rubrobacter xylanophilus</i> DSM 9941 uid58057          | thermophilic               | aerobic          | 19.7                     | 9.5              |
| <i>Rhodothermus marinus</i> DSM 4252 uid41729              | thermophilic               | aerobic          | 19.7                     | 7.2              |
| <i>Calditerrivibrio nitroreducens</i> DSM 19672 uid60821   | thermophilic               | anaerobic        | 19.4                     | 8.6              |
| <i>Eggerthella lenta</i> DSM 2243 uid59079                 | mesophilic                 | anaerobic        | 19.1                     | 6.7              |
| <i>Denitrovibrio acetiphilus</i> DSM 12809 uid46657        | mesophilic                 | anaerobic        | 18.8                     | 6.8              |
| <i>Geobacter uranitireducens</i> Rf4 uid58475              | mesophilic                 | anaerobic        | 18.8                     | 7.0              |
| <i>Slackia heliotrinireducens</i> DSM 20476 uid59051       | mesophilic                 | anaerobic        | 18.8                     | 6.6              |
| <i>Desulfotomaculum kuznetsovii</i> DSM 6115 uid67357      | mesophilic                 | anaerobic        | 18.7                     | 7.5              |
| <i>Heliobacterium modesticaldum</i> Ice1 uid58279          | thermophilic               | anaerobic        | 17.9                     | 6.1              |
| <i>Ammonifex degensii</i> KC4 uid41053                     | thermophilic               | anaerobic        | 17.5                     | 7.2              |
| <i>Anaerobaculum mobile</i> DSM 13181 uid168323            | thermophilic               | anaerobic        | 17.5                     | 8.8              |
| <i>Gemmatimonas aurantiaca</i> T 27 uid58813               | mesophilic                 | aerobic          | 17.4                     | 5.9              |
| <i>Treponema primitia</i> ZAS 2 uid67367                   | mesophilic                 | anaerobic        | 17.3                     | 5.1              |
| <i>Eggerthella</i> YY7918 uid68707                         | mesophilic                 | anaerobic        | 17.1                     | 6.2              |
| <i>Treponema brennaborense</i> DSM 12168 uid66607          | mesophilic                 | anaerobic        | 16.7                     | 6.3              |
| <i>Granulicella mallensis</i> MP5ACTX8 uid49957            | mesophilic                 | aerobic          | 16.6                     | 6.4              |
| <i>Treponema succinifaciens</i> DSM 2489 uid65781          | mesophilic                 | anaerobic        | 16.4                     | 5.1              |
| <i>Flexistipes sinusarabici</i> DSM 4947 uid68147          | thermophilic               | anaerobic        | 16.4                     | 6.7              |
| <i>Geobacter metallireducens</i> GS 15 uid57731            | mesophilic                 | anaerobic        | 16.2                     | 6.9              |
| <i>Clostridium clariflavum</i> DSM 19732 uid82345          | thermophilic               | anaerobic        | 15.6                     | 4.8              |
| <i>Desulfurivibrio alkaliphilus</i> AHT2 uid49487          | mesophilic                 | anaerobic        | 15.5                     | 6.1              |
| <i>Thermosediminibacter oceani</i> DSM 16646 uid51421      | thermophilic               | anaerobic        | 15.3                     | 7.4              |
| <i>Desulfobulbus propionicus</i> DSM 2032 uid62265         | mesophilic                 | anaerobic        | 15.1                     | 5.3              |
| <i>Pelobacter carbinolicus</i> DSM 2380 uid58241           | mesophilic                 | anaerobic        | 15.1                     | 6.7              |
| <i>Sphaerochaeta pleomorpha</i> Grapes uid82365 **         | mesophilic                 | anaerobic        | 15.0                     | 5.9              |

**Table S6. Comparison of the frequency of inter-phylum HGT between the most transferred metabolic and informational genes used to resolved the Tree of Life.**

| <b>Functional group (COGs)</b>  | <b>Functional Classification</b> | <b>Frequency in HGT genes (%)</b> | <b>Frequency in the genome (%)</b> | <b>Ratio (In HGT / In genome)</b> |
|---------------------------------|----------------------------------|-----------------------------------|------------------------------------|-----------------------------------|
| COG0080                         | Informational                    | 0.039                             | 0.059                              | 0.654                             |
| COG0012                         | Informational                    | 0.013                             | 0.059                              | 0.219                             |
| COG0018                         | Informational                    | 0.010                             | 0.056                              | 0.173                             |
| COG0172                         | Informational                    | 0.010                             | 0.061                              | 0.160                             |
| COG0522                         | Informational                    | 0.006                             | 0.061                              | 0.105                             |
| COG0495                         | Informational                    | 0.003                             | 0.055                              | 0.058                             |
| Total                           |                                  | 0.081                             | 0.351                              |                                   |
| COG1028                         | Metabolic                        | 3.793                             | 0.731                              | 5.185                             |
| COG1012                         | Metabolic                        | 2.215                             | 0.361                              | 6.139                             |
| COG0667                         | Metabolic                        | 1.860                             | 0.147                              | 12.681                            |
| COG1126                         | Metabolic                        | 1.731                             | 0.145                              | 11.965                            |
| COG0183                         | Metabolic                        | 1.587                             | 0.186                              | 8.557                             |
| COG0129                         | Metabolic                        | 1.328                             | 0.082                              | 16.213                            |
| Total                           |                                  | 12.515                            | 1.651                              |                                   |
| Ratio (Metabolic/Informational) |                                  | 155.4                             | 4.7                                |                                   |

**Table S7. Detected cases of inter-phyla HGT of highly conserved housekeeping genes.**

| <b>Functional category (COGs)</b>         | <b>Accession number (gi)</b>                                         | <b>Detected partners of exchange</b>                                       |                                                                       |
|-------------------------------------------|----------------------------------------------------------------------|----------------------------------------------------------------------------|-----------------------------------------------------------------------|
| Predicted GTPase<br>(COG0012)             | 114331141                                                            | <i>Nitrosomonas eutropha</i> <-> <i>Candidatus Nitrospira defluvii</i>     |                                                                       |
|                                           | 30249777                                                             | <i>Nitrosomonas europaea</i> <-> <i>Candidatus Nitrospira defluvii</i>     |                                                                       |
|                                           | 134299143                                                            | <i>Desulfotomaculum reducens</i> <-> <i>Rhodopseudomonas palustris</i>     |                                                                       |
|                                           | 225873673                                                            | <i>Acidobacterium capsulatum</i> <-> <i>Bdellovibrio bacteriovorus</i>     |                                                                       |
| Arnyl-tRNA<br>synthetase<br>(COG0018)     | 145592712                                                            | <i>Salinispora tropica</i> <-> <i>Soranum cellulorum</i>                   |                                                                       |
|                                           | 159035826                                                            | <i>Salinispora arenicola</i> <-> <i>Soranum cellulorum</i>                 |                                                                       |
|                                           | 302870428                                                            | <i>Micromonospora aurantiaca</i> <-> <i>Soranum cellulorum</i>             |                                                                       |
| Ribosomal protein<br>L11<br>(COG0080)     | 386357197                                                            | <i>Streptomyces cattleya</i> <-> <i>Thermosynechococcus elongatus</i>      |                                                                       |
|                                           | 145596448                                                            | <i>Salinispora tropica</i> <-> <i>Thiomicrospira crunogena</i>             |                                                                       |
|                                           | 159039848                                                            | <i>Salinispora arenicola</i> <-> <i>Thiomicrospira crunogena</i>           |                                                                       |
|                                           | 331699209                                                            | <i>Pseudonocardia dioxanivorans</i> <-> <i>Staphylococcus haemolyticus</i> |                                                                       |
|                                           | 302869987                                                            | <i>Micromonospora aurantiaca</i> <-> <i>Thermosynechococcus elongatus</i>  |                                                                       |
|                                           | 284992891                                                            | <i>Geodermatophilus obscurus</i> <-> <i>Staphylococcus haemolyticus</i>    |                                                                       |
|                                           | 148263130                                                            | <i>Geobacter uraniireducens</i> <-> <i>Clostridium acetobutylicum</i>      |                                                                       |
|                                           | 253701933                                                            | <i>Geobacter M21</i> <-> <i>Eubacterium rectale</i>                        |                                                                       |
|                                           | 322418353                                                            | <i>Geobacter M18</i> <-> <i>Eubacterium rectale</i>                        |                                                                       |
|                                           | 197117312                                                            | <i>Geobacter bemidjiensis</i> <-> <i>Eubacterium rectale</i>               |                                                                       |
|                                           | 86739282                                                             | <i>Frankia Cc13</i> <-> <i>Anabaena variabilis</i>                         |                                                                       |
| 117927504                                 | <i>Acidothermus cellulolyticus</i> <-> <i>Synechococcus JA 3 3Ab</i> |                                                                            |                                                                       |
| Seryl-tRNA<br>synthetase<br>(COG0172) **  | 386356659                                                            | <i>Streptomyces cattleya</i> <-> <i>Streptococcus suis</i>                 |                                                                       |
|                                           | 111221587                                                            | <i>Frankia alni</i> <-> <i>Streptococcus suis</i>                          |                                                                       |
|                                           | 392413758                                                            | <i>Desulfomonile tiedjei</i> <-> <i>Streptococcus suis</i>                 |                                                                       |
| Leucyl-tRNA<br>synthetase<br>(COG0495) ** | 241205056                                                            | <i>Rhizobium leguminosarum</i> <-> <i>Bacillus cereus</i>                  |                                                                       |
|                                           | Ribosomal protein S4<br>(COG0522)                                    | 253998040                                                                  | <i>Methylovorus glucosetrophus</i> <-> <i>Clostridium lentocellum</i> |
|                                           | 253995743                                                            | <i>Methylotenera mobilis</i> <-> <i>Clostridium lentocellum</i>            |                                                                       |

**Table S8. Most extensive cases of genetic exchange across phyla observed.**

***Pelotomaculum thermopropionicum* and *Syntrophobacter fumaroxidans***

| Synthetic Region | Gi 1         | Gi 2         | Annotation                                                                                     | a.a. identity (%) |
|------------------|--------------|--------------|------------------------------------------------------------------------------------------------|-------------------|
| 1                | gi_147676911 | gi_116751364 | YP 001211126.1 ABC-type nitrate/sulfonate/bicarbonate transport system, ATPase component       | 62                |
| 1                | gi_147676910 | gi_116751363 | YP 001211125.1 ABC-type nitrate/sulfonate/bicarbonate transport system, periplasmic components | 61.9              |
| 1                | gi_147676909 | gi_116751362 | YP 001211124.1 ABC-type nitrate/sulfonate/bicarbonate transport system, permease component     | 65.6              |
| 1                | gi_147676908 | gi_116751361 | YP 001211123.1 hypothetical protein PTH 0573                                                   | 40.8              |
| 1                | gi_147676907 | gi_116751360 | YP 001211122.1 ABC-type nitrate/sulfonate/bicarbonate transport system, periplasmic components | 54.4              |
| 1                | gi_147676906 | gi_116751359 | YP 001211121.1 hypothetical protein PTH 0571                                                   | 49.3              |
| 1                | gi_147676905 | gi_116751358 | YP 001211120.1 permease                                                                        | 64.2              |
| 1                | gi_147676904 | gi_116751357 | YP 001211119.1 hypothetical protein PTH 0569                                                   | 64.6              |
| 2                | gi_147678107 | gi_116751351 | YP 001212322.1 transcriptional regulator                                                       | 68.5              |
| 2                | gi_147678106 | gi_116751350 | YP 001212321.1 acyl CoA:acetate/3-ketoacid CoA transferase                                     | 79.2              |
| 2                | gi_147678105 | gi_116751349 | YP 001212320.1 aromatic ring hydroxylase                                                       | 81.5              |
| 2                | gi_147676350 | gi_116751348 | YP 001212319.1 acyl-CoA dehydrogenases                                                         | 81.5              |
| 2                | gi_147676849 | gi_116751347 | YP 001211064.1 electron transfer flavoprotein                                                  | 68.3              |
| 2                | gi_147676352 | gi_116751346 | YP 001210567.1 electron transfer flavoprotein, alpha subunit                                   | 61                |
| 2                | gi_147676353 | gi_116751344 | YP 001210568.1 dehydrogenases                                                                  | 67.1              |
| 2                | gi_147678100 | gi_116751343 | YP 001212315.1 ferredoxin-like protein                                                         | 72.9              |
| 2                | gi_147676354 | gi_116751343 | YP 001210569.1 ferredoxin-like protein                                                         | 71.9              |
| 2                | gi_147678099 | gi_116751342 | YP 001212314.1 sugar phosphate permease                                                        | 72.8              |
| 3                | gi_147678347 | gi_116748291 | YP 001212562.1 NADH:ubiquinone oxidoreductase, 24 kD subunit                                   | 75.2              |
| 3                | gi_147678346 | gi_116748290 | YP 001212561.1 NADH:ubiquinone oxidoreductase, NADH-binding 51 kD subunit                      | 81.9              |

|   |              |              |                                                   |      |
|---|--------------|--------------|---------------------------------------------------|------|
| 3 | gi_147678345 | gi_116748289 | YP 001212560.1 hydrogenase subunit                | 81.8 |
| 3 | gi_147677315 | gi_116748288 | YP 001211530.1 hypothetical protein PTH 0980      | 70.9 |
| 3 | gi_147677319 | gi_116748287 | YP 001211534.1 thiamine biosynthesis protein ThiH | 73.8 |

**Desulfurivibrio alkaliphilus and Thermodesulfatator indicus**

| Synthetic Region | Gi 1         | Gi 2         | Annotation                                                                    | a.a. identity (%) |
|------------------|--------------|--------------|-------------------------------------------------------------------------------|-------------------|
| 1                | gi_297569850 | gi_337286693 | YP 003691194.1 ATP synthase F1, epsilon subunit                               | 64.1              |
| 1                | gi_297569851 | gi_337286692 | YP 003691195.1 ATP synthase F1, beta subunit                                  | 81.1              |
| 1                | gi_297569852 | gi_337286691 | YP 003691196.1 ATP synthase F1, gamma subunit                                 | 53.6              |
| 1                | gi_297569853 | gi_337286690 | YP 003691197.1 ATP synthase F1, alpha subunit                                 | 71.1              |
| 2                | gi_297568705 | gi_337287265 | YP 003690049.1 acetolactate synthase, small subunit                           | 66                |
| 2                | gi_297568704 | gi_337287264 | YP 003690048.1 acetolactate synthase, large subunit, biosynthetic type        | 66.1              |
| 3                | gi_297570015 | gi_337287397 | YP 003691359.1 flavodoxin/nitric oxide synthase                               | 64.3              |
| 3                | gi_297570016 | gi_337287396 | YP 003691360.1 desulfoferrodoxin                                              | 75                |
| 4                | gi_297568804 | gi_337287522 | YP 003690148.1 CO dehydrogenase/acetyl-CoA synthase complex, beta subunit     | 67.7              |
| 4                | gi_297568803 | gi_337287521 | YP 003690147.1 CO dehydrogenase/acetyl-CoA synthase delta subunit, TIM barrel | 65.2              |
| 5                | gi_297569271 | gi_337286233 | YP 003690615.1 ATP-dependent protease La                                      | 61                |
| 5                | gi_297569272 | gi_337286232 | YP 003690616.1 ATP-dependent Clp protease, ATP-binding subunit ClpX           | 66.7              |
| 5                | gi_297569273 | gi_337286231 | YP 003690617.1 ATP-dependent Clp protease, proteolytic subunit ClpP           | 69.4              |
| 6                | gi_297569689 | gi_337285563 | YP 003691033.1 flagellar biosynthesis protein FlhA                            | 61.4              |
| 6                | gi_297569688 | gi_337285562 | YP 003691032.1 flagellar biosynthetic protein FlhB                            | 45.9              |
| 6                | gi_297569686 | gi_337285560 | YP 003691030.1 flagellar biosynthetic protein FliQ                            | 50.6              |

|   |              |              |                                                                    |      |
|---|--------------|--------------|--------------------------------------------------------------------|------|
| 6 | gi_297569685 | gi_337285559 | YP 003691029.1 flagellar biosynthetic protein FliP                 | 60.5 |
| 7 | gi_297568282 | gi_337285778 | YP 003689626.1 sulfite reductase, dissimilatory-type alpha subunit | 65.3 |
| 7 | gi_297568283 | gi_337285777 | YP 003689627.1 sulfite reductase, dissimilatory-type beta subunit  | 67.7 |
| 8 | gi_297569325 | gi_337286362 | YP 003690669.1 ATP phosphoribosyltransferase                       | 70.1 |
| 8 | gi_297569326 | gi_337286361 | YP 003690670.1 Phosphoribosyl-AMP cyclohydrolase                   | 67.5 |
| 8 | gi_297568921 | gi_337286359 | YP 003690265.1 3-deoxy-D-manno-octulosonate<br>cytidyltransferase  | 55.2 |
| 9 | gi_297570151 | gi_337286467 | YP 003691495.1 ornithine carbamoyltransferase                      | 62.8 |
| 9 | gi_297569521 | gi_337286466 | YP 003690865.1 thiamine biosynthesis protein ThiC                  | 64.6 |

**Streptococcus gordonii Challis substr CH1 and Leptotrichia buccalis C 1013 b**

| Synthetic Region | Gi 1         | Gi 2         | Annotation                                                             | a.a. identity (%) |
|------------------|--------------|--------------|------------------------------------------------------------------------|-------------------|
| 1                | gi_157149908 | gi_257125329 | YP 001450422.1 acetoin dehydrogenase                                   | 72.1              |
| 1                | gi_157151664 | gi_257125330 | YP 001450421.1 acetoin dehydrogenase                                   | 78.2              |
| 1                | gi_157151137 | gi_257125331 | YP 001450420.1 dihydrolipoamide acetyltransferase                      | 62.5              |
| 1                | gi_157150243 | gi_257125332 | YP 001450419.1 dihydrolipoamide dehydrogenase                          | 65.3              |
| 1                | gi_157149679 | gi_257125333 | YP 001450418.1 lipoate protein ligase A                                | 65                |
| 2                | gi_157150143 | gi_257125371 | YP 001450805.1 galactose-6-phosphate isomerase subunit LacA            | 66                |
| 2                | gi_157149701 | gi_257125372 | YP 001450797.1 galactose-6-phosphate isomerase subunit LacB            | 78.9              |
| 2                | gi_157151561 | gi_257125373 | YP 001450796.1 tagatose-6-phosphate kinase                             | 62.8              |
| 2                | gi_157151000 | gi_257125374 | YP 001450795.1 tagatose 1,6-diphosphate aldolase                       | 71.4              |
| 2                | gi_157150563 | gi_257125375 | YP 001450793.1 PTS system lactose-specific transporter subunit<br>IIA  | 65.7              |
| 2                | gi_157151244 | gi_257125376 | YP 001450792.1 PTS system lactose-specific transporter subunit<br>IIBC | 80.5              |
| 2                | gi_157150880 | gi_257125377 | YP 001450791.1 6-phospho-beta-galactosidase                            | 82                |

|    |              |              |                                                                                   |      |
|----|--------------|--------------|-----------------------------------------------------------------------------------|------|
| 3  | gi_157151415 | gi_257125430 | YP 001450823.1 FOF1 ATP synthase subunit alpha                                    | 60   |
| 3  | gi_157151073 | gi_257125432 | YP 001450821.1 FOF1 ATP synthase subunit beta                                     | 70.4 |
| 4  | gi_157150337 | gi_257125543 | YP 001449457.1 V-type ATP synthase subunit A                                      | 66.6 |
| 4  | gi_157149878 | gi_257125544 | YP 001449458.1 V-type ATP synthase subunit B                                      | 73.2 |
| 5  | gi_157150912 | gi_257125927 | YP 001449690.1 malate dehydrogenase                                               | 68.4 |
| 5  | gi_157150902 | gi_257125929 | YP 001449344.1 tRNA-specific 2-thiouridylase MnmA                                 | 64.6 |
| 7  | gi_157150310 | gi_257126555 | YP 001450452.1 putative lipoprotein                                               | 68.9 |
| 7  | gi_157150275 | gi_257126556 | YP 001450451.1 tat translocated dye-type peroxidase family protein                | 64.2 |
| 7  | gi_157149693 | gi_257126557 | YP 001450450.1 FTR1 family iron permease                                          | 52   |
| 7  | gi_157150071 | gi_257126558 | YP 001450449.1 Sec-independent protein translocase TatC                           | 59.4 |
| 7  | gi_157151040 | gi_257126559 | YP 001450448.1 twin arginine-targeting protein translocase                        | 62.5 |
| 8  | gi_157149993 | gi_257126077 | YP 001450429.1 ATP-dependent protease ATP-binding subunit ClpX                    | 60.6 |
| 8  | gi_157151545 | gi_257126078 | YP 001450909.1 ATP-dependent Clp protease proteolytic subunit                     | 59.6 |
| 8  | gi_157149990 | gi_257126963 | YP 001449596.1 dihydroorotate dehydrogenase 1A                                    | 78.1 |
| 8  | gi_157149754 | gi_257126964 | YP 001450542.1 NAD-dependent deacetylase                                          | 62.7 |
| 9  | gi_157151254 | gi_257125263 | YP 001451012.1 integral membrane protein                                          | 78.2 |
| 9  | gi_157151094 | gi_257125264 | YP 001449935.1 glycerol kinase                                                    | 59   |
| 10 | gi_157150100 | gi_257125243 | YP 001450958.1 PTS system mannose/fructose/sorbose family transporter subunit IID | 68   |
| 10 | gi_157150304 | gi_257125244 | YP 001450957.1 phosphotransferase system enzyme II                                | 63.1 |
| 10 | gi_157151038 | gi_257125245 | YP 001450956.1 phosphotransferase system enzyme II                                | 61.8 |

**Desulfurispirillum indicum S5 and Marinobacter aquaeolei VT8**

| Synthetic Region | Gi 1         | Gi 2         | Annotation                                                                      | a.a. identity (%) |
|------------------|--------------|--------------|---------------------------------------------------------------------------------|-------------------|
| 1                | gi_317050217 | gi_120553820 | YP 004111333.1 transposase IS204/IS1001/IS1096/IS1165 family protein            | 99.3              |
| 1                | gi_317050216 | gi_120553821 | YP 004111332.1 lipoprotein signal peptidase                                     | 98.8              |
| 1                | gi_317050206 | gi_120553822 | YP 004111322.1 cation efflux protein                                            | 97                |
| 1                | gi_317050205 | gi_120553826 | YP 004111321.1 Cd(II)/Pb(II)-responsive transcriptional regulator               | 90.4              |
| 1                | gi_317050214 | gi_120553826 | YP 004111330.1 Cd(II)/Pb(II)-responsive transcriptional regulator               | 97.8              |
| 1                | gi_317050213 | gi_120553909 | YP 004111329.1 integron integrase                                               | 52.5              |
| 1                | gi_317050211 | gi_120553989 | YP 004111327.1 small multidrug resistance protein                               | 68                |
| 2                | gi_317050253 | gi_120553460 | YP 004111369.1 nitrogen regulatory protein P-II                                 | 64.3              |
| 2                | gi_317050254 | gi_120554275 | YP 004111370.1 general secretion pathway protein G                              | 65.2              |
| 3                | gi_317051135 | gi_120555535 | YP 004112251.1 sulfate adenylyltransferase small subunit                        | 77.7              |
| 3                | gi_317051136 | gi_120555646 | YP 004112252.1 sulfate adenylyltransferase large subunit                        | 63.9              |
| 4                | gi_317051301 | gi_120553293 | YP 004112417.1 TRAP dicarboxylate transporter subunit DctM                      | 80                |
| 4                | gi_317051300 | gi_120553294 | YP 004112416.1 tripartite ATP-independent periplasmic transporter subunit DctQ  | 61.3              |
| 4                | gi_317051299 | gi_120553295 | YP 004112415.1 family 7 extracellular solute-binding protein                    | 69.3              |
| 4                | gi_317051296 | gi_120553973 | YP 004112412.1 ABC transporter-like protein                                     | 60.5              |
| 4                | gi_317051303 | gi_120554460 | YP 004112419.1 binding-protein-dependent transporter inner membrane component   | 68                |
| 4                | gi_317051304 | gi_120554461 | YP 004112420.1 ABC transporter-like protein                                     | 55.6              |
| 5                | gi_317051351 | gi_120554670 | YP 004112467.1 Agmatine deiminase                                               | 52.1              |
| 5                | gi_317051350 | gi_120554671 | YP 004112466.1 nitrilase/cyanide hydratase and apolipoprotein N-acyltransferase | 62                |
| 5                | gi_317051352 | gi_120554979 | YP 004112468.1 TRAP transporter, 4TM/12TM fusion protein                        | 62.8              |
| 5                | gi_317051353 | gi_120554980 | YP 004112469.1 TAXI family TRAP transporter solute receptor                     | 63.1              |



|   |              |              |                                                                                    |      |
|---|--------------|--------------|------------------------------------------------------------------------------------|------|
| 7 | gi_317052328 | gi_120556164 | YP 004113444.1 phosphonate ABC transporter periplasmic phosphonate-binding protein | 64.2 |
| 7 | gi_317052327 | gi_120556165 | YP 004113443.1 phosphonate ABC transporter ATPase subunit                          | 69.8 |
| 7 | gi_317052326 | gi_120556166 | YP 004113442.1 phosphonate ABC transporter inner membrane subunit                  | 66.9 |
| 7 | gi_317052325 | gi_120556167 | YP 004113441.1 phosphonate ABC transporter inner membrane subunit                  | 65.8 |

***Caldicellulosiruptor hydrothermalis* 108 and *Thermotoga thermarum* DSM 5069**

| Synthetic Region | Gi 1         | Gi 2         | Annotation                                                           | a.a. identity (%) |
|------------------|--------------|--------------|----------------------------------------------------------------------|-------------------|
| 1                | gi_312128371 | gi_338730006 | YP 003991766.1 3-isopropylmalate dehydrogenase                       | 72.8              |
| 1                | gi_312128370 | gi_338730005 | YP 003991765.1 3-isopropylmalate dehydratase, small subunit          | 74.4              |
| 1                | gi_312128369 | gi_338730004 | YP 003991764.1 3-isopropylmalate dehydratase, large subunit          | 83.6              |
| 1                | gi_312128368 | gi_338730295 | YP 003991973.1 pyridoxine biosynthesis protein                       | 64.6              |
| 2                | gi_312128334 | gi_338730008 | YP 003991968.1 oligopeptide/dipeptide ABC transporter ATPase subunit | 68.8              |
| 2                | gi_312128333 | gi_338730007 | YP 003992157.1 tryptophan synthase subunit alpha                     | 60.6              |
| 3                | gi_312128165 | gi_338729930 | YP 003992156.1 tryptophan synthase subunit beta                      | 74.5              |
| 3                | gi_312128164 | gi_338730159 | YP 003992155.1 phosphoribosylanthranilate isomerase                  | 62                |
| 4                | gi_312127781 | gi_338731040 | YP 003992154.1 indole-3-glycerol-phosphate synthase                  | 70.9              |
| 4                | gi_312127780 | gi_338730055 | YP 003992153.1 anthranilate phosphoribosyltransferase                | 81.4              |
| 5                | gi_312127526 | gi_338730088 | YP 003992152.1 glutamine amidotransferase of anthranilate synthase   | 74.7              |
| 5                | gi_312127524 | gi_338730086 | YP 003992151.1 chorismate binding-like protein                       | 67.9              |
| 6                | gi_312127472 | gi_338730808 | YP 003992346.1 histidinol dehydrogenase                              | 62.8              |
| 6                | gi_312127471 | gi_338730807 | YP 003992345.1 ATP phosphoribosyltransferase                         | 65.4              |

|   |              |              |                                                                        |      |
|---|--------------|--------------|------------------------------------------------------------------------|------|
| 7 | gi_312127099 | gi_338731576 | YP 003993207.1 isocitrate dehydrogenase (nad(+))                       | 69.8 |
| 7 | gi_312127094 | gi_338731090 | YP 003993245.1 acetolactate synthase, large subunit, biosynthetic type | 63.3 |
| 8 | gi_312126892 | gi_338730292 | YP 003993244.1 acetolactate synthase, small subunit                    | 60.5 |
| 8 | gi_312126891 | gi_338730293 | YP 003993243.1 ketol-acid reductoisomerase                             | 66.3 |
| 8 | gi_312126890 | gi_338730294 | YP 003993242.1 2-isopropylmalate synthase                              | 64.6 |

**Candidatus Nitrospira defluvii and Janthinobacterium Marseille**

| Synthetic Region | Gi 1         | Gi 2         | Annotation                                                                          | a.a. identity (%) |
|------------------|--------------|--------------|-------------------------------------------------------------------------------------|-------------------|
| 1                | gi_302035457 | gi_152981820 | YP 003795779.1 hypothetical protein NIDE0063                                        | 61.5              |
| 1                | gi_302035458 | gi_152981934 | YP 003795780.1 mercuric resistance operon regulatory protein                        | 67.7              |
| 1                | gi_302035459 | gi_152982220 | YP 003795781.1 mercury ion transport protein                                        | 69.2              |
| 1                | gi_302035460 | gi_152982938 | YP 003795782.1 periplasmic mercury ion binding protein                              | 71.9              |
| 1                | gi_302035462 | gi_152982873 | YP 003795784.1 hypothetical protein NIDE0068                                        | 74.2              |
| 1                | gi_302035463 | gi_152982221 | YP 003795785.1 hypothetical protein NIDE0069                                        | 95.8              |
| 1                | gi_302035464 | gi_152981666 | YP 003795786.1 putative site-specific recombinase, resolvase family (phage related) | 94.4              |
| 1                | gi_302035465 | gi_152982797 | YP 003795787.1 hypothetical protein NIDE0071                                        | 91.3              |
| 1                | gi_302035466 | gi_152983289 | YP 003795788.1 hypothetical protein NIDE0072                                        | 82.4              |
| 1                | gi_302035471 | gi_152983290 | YP 003795793.1 hypothetical protein NIDE0079                                        | 71.3              |
| 1                | gi_302035472 | gi_152982677 | YP 003795794.1 hypothetical protein NIDE0080                                        | 80.9              |
| 1                | gi_302035473 | gi_152982207 | YP 003795795.1 hypothetical protein NIDE0081                                        | 90.4              |
| 1                | gi_302035474 | gi_152982323 | YP 003795796.1 hypothetical protein NIDE0082                                        | 84.4              |
| 1                | gi_302035475 | gi_152982824 | YP 003795797.1 hypothetical protein NIDE0083                                        | 85.2              |
| 1                | gi_302035476 | gi_152982461 | YP 003795798.1 hypothetical protein NIDE0084                                        | 75.5              |
| 1                | gi_302035477 | gi_152982378 | YP 003795799.1 hypothetical protein NIDE0085                                        | 83.3              |
| 1                | gi_302035478 | gi_152982760 | YP 003795800.1 hypothetical protein NIDE0086                                        | 67.4              |
| 1                | gi_302035479 | gi_152981706 | YP 003795801.1 putative DNA primase'                                                | 87.9              |
| 1                | gi_302035480 | gi_152982142 | YP 003795802.1 putative polynucleotidyl transferase                                 | 90.2              |
| 1                | gi_302035481 | gi_152983291 | YP 003795803.1 hypothetical protein NIDE0090                                        | 79.6              |

|   |              |              |                                                                            |      |
|---|--------------|--------------|----------------------------------------------------------------------------|------|
| 1 | gi_302035483 | gi_152982005 | YP 003795805.1 site-specific DNA-methyltransferase N-4/N-6 (phage related) | 85.1 |
| 1 | gi_302035484 | gi_152981982 | YP 003795806.1 site-specific DNA-methyltransferase N-4/N-6 (phage related) | 92   |
| 1 | gi_302035485 | gi_152983294 | YP 003795807.1 hypothetical protein NIDE0094                               | 82.4 |
| 1 | gi_302035486 | gi_152982304 | YP 003795808.1 hypothetical protein NIDE0095                               | 85.7 |
| 1 | gi_302035487 | gi_152982162 | YP 003795809.1 hypothetical protein NIDE0097                               | 68.2 |
| 1 | gi_302035489 | gi_152982161 | YP 003795811.1 hypothetical protein NIDE0099                               | 96.6 |
| 1 | gi_302035490 | gi_152981093 | YP 003795812.1 phage terminase large subunit                               | 95.3 |
| 1 | gi_302035491 | gi_152982062 | YP 003795813.1 hypothetical protein NIDE0101                               | 95.7 |
| 1 | gi_302035492 | gi_152982876 | YP 003795814.1 hypothetical protein NIDE0102                               | 93.1 |
| 1 | gi_302035493 | gi_152982972 | YP 003795815.1 hypothetical protein NIDE0103                               | 93.2 |
| 1 | gi_302035494 | gi_152981081 | YP 003795816.1 phage portal protein, lambda family                         | 87.3 |
| 1 | gi_302035495 | gi_152981533 | YP 003795817.1 putative phage minor capsid protein C                       | 73.8 |
| 1 | gi_302035496 | gi_152982282 | YP 003795818.1 hypothetical protein NIDE0106                               | 80   |
| 1 | gi_302035497 | gi_152982830 | YP 003795819.1 hypothetical protein NIDE0107                               | 91   |
| 1 | gi_302035498 | gi_152982165 | YP 003795820.1 hypothetical protein NIDE0108                               | 80   |
| 1 | gi_302035499 | gi_152982164 | YP 003795821.1 hypothetical protein NIDE0109                               | 92.9 |
| 1 | gi_302035500 | gi_152982980 | YP 003795822.1 hypothetical protein NIDE0110                               | 71.8 |
| 1 | gi_302035501 | gi_152982163 | YP 003795823.1 hypothetical protein NIDE0111                               | 98.4 |
| 1 | gi_302035502 | gi_152982160 | YP 003795824.1 hypothetical protein NIDE0112                               | 95.5 |
| 1 | gi_302035503 | gi_152982159 | YP 003795825.1 hypothetical protein NIDE0113                               | 98.1 |
| 1 | gi_302035504 | gi_152982158 | YP 003795826.1 putative phage tail length tape measure protein             | 91.3 |
| 1 | gi_302035505 | gi_152982157 | YP 003795827.1 hypothetical protein NIDE0115                               | 96.9 |
| 1 | gi_302035506 | gi_152982156 | YP 003795828.1 hypothetical protein NIDE0116                               | 87.8 |
| 1 | gi_302035507 | gi_152982127 | YP 003795829.1 hypothetical protein NIDE0117                               | 87.8 |
| 1 | gi_302035509 | gi_152982262 | YP 003795831.1 hypothetical protein NIDE0119                               | 89   |
| 1 | gi_302035510 | gi_152982615 | YP 003795832.1 hypothetical protein NIDE0120                               | 97.5 |
| 1 | gi_302035511 | gi_152982541 | YP 003795833.1 hypothetical protein NIDE0121                               | 87.1 |
| 1 | gi_302035512 | gi_152982982 | YP 003795834.1 hypothetical protein NIDE0122                               | 91   |

|   |              |              |                                                  |      |
|---|--------------|--------------|--------------------------------------------------|------|
| 2 | gi_302036778 | gi_152979893 | YP 003797100.1 chorismate synthase               | 74.2 |
| 2 | gi_302036779 | gi_152980654 | YP 003797101.1 ribonuclease H                    | 68.8 |
| 3 | gi_302038815 | gi_152981067 | YP 003799137.1 multidrug efflux system subunit C | 60.7 |
| 3 | gi_302038816 | gi_152981117 | YP 003799138.1 multidrug efflux system subunit B | 63.2 |

**Clostridium saccharolyticum WM1 and Sphaerochaeta pleomorpha Grapes**

| Synthetic Region | Gi 1         | Gi 2         | Annotation                                                                       | a.a. identity (%) |
|------------------|--------------|--------------|----------------------------------------------------------------------------------|-------------------|
| 1                | gi_302385696 | gi_374314595 | YP 003821518.1 binding-protein-dependent transport system inner membrane protein | 72.3              |
| 1                | gi_302385695 | gi_374314596 | YP 003821517.1 binding-protein-dependent transport system inner membrane protein | 69.1              |
| 1                | gi_302385694 | gi_374314597 | YP 003821516.1 extracellular solute-binding protein                              | 64.4              |
| 2                | gi_302386292 | gi_374314822 | YP 003822114.1 ABC transporter                                                   | 72.1              |
| 2                | gi_302386293 | gi_374314823 | YP 003822115.1 inner-membrane translocator                                       | 75.9              |
| 2                | gi_302386294 | gi_374314824 | YP 003822116.1 LacI family transcriptional regulator                             | 72.2              |
| 3                | gi_302387219 | gi_374314977 | YP 003823041.1 short-chain dehydrogenase/reductase SDR                           | 76                |
| 3                | gi_302387813 | gi_374314978 | YP 003823635.1 4-deoxy-L-threo-5-hexosulose-uronate ketol-isomerase              | 59.6              |
| 4                | gi_302385761 | gi_374315043 | YP 003821583.1 L-fucose isomerase-like protein                                   | 63.5              |
| 4                | gi_302385109 | gi_374315044 | YP 003820931.1 class II aldolase/adducin family protein                          | 62.8              |
| 5                | gi_302387893 | gi_374315132 | YP 003823715.1 protein-tyrosine phosphatase                                      | 76.4              |
| 5                | gi_302387095 | gi_374315133 | YP 003822917.1 redox-active disulfide protein 2                                  | 50.4              |
| 5                | gi_302387097 | gi_374315134 | YP 003822919.1 permease                                                          | 69.9              |
| 6                | gi_302388266 | gi_374315140 | YP 003824088.1 ABC transporter                                                   | 56.6              |
| 6                | gi_302386838 | gi_374315141 | YP 003822660.1 inner-membrane translocator                                       | 70.4              |

|    |              |              |                                                                                  |      |
|----|--------------|--------------|----------------------------------------------------------------------------------|------|
| 6  | gi_302386840 | gi_374315143 | YP 003822662.1 ABC transporter                                                   | 63.4 |
| 6  | gi_302386841 | gi_374315144 | YP 003822663.1 basic membrane lipoprotein                                        | 64.6 |
| 7  | gi_302384518 | gi_374315235 | YP 003820340.1 flavodoxin/nitric oxide synthase                                  | 75.8 |
| 7  | gi_302387044 | gi_374315237 | YP 003822866.1 arsenical-resistance protein                                      | 69.4 |
| 7  | gi_302387889 | gi_374315238 | YP 003823711.1 ArsR family transcriptional regulator                             | 60   |
| 8  | gi_302387949 | gi_374315291 | YP 003823771.1 tryptophan synthase subunit beta                                  | 77.2 |
| 8  | gi_302387950 | gi_374315292 | YP 003823772.1 tryptophan synthase subunit alpha                                 | 60.8 |
| 9  | gi_302385599 | gi_374315380 | YP 003821421.1 binding-protein-dependent transport system inner membrane protein | 66.9 |
| 9  | gi_302385598 | gi_374315381 | YP 003821420.1 extracellular solute-binding protein                              | 64.2 |
| 10 | gi_302387979 | gi_374315440 | YP 003823801.1 dihydroxy-acid dehydratase                                        | 65.7 |
| 10 | gi_302387980 | gi_374315441 | YP 003823802.1 3-isopropylmalate dehydrogenase                                   | 62.8 |
| 10 | gi_302386582 | gi_374315442 | YP 003822404.1 3-isopropylmalate dehydratase small subunit                       | 70.2 |
| 10 | gi_302386583 | gi_374315443 | YP 003822405.1 3-isopropylmalate dehydratase large subunit                       | 71.1 |
| 10 | gi_302386585 | gi_374315446 | YP 003822407.1 ketol-acid reductoisomerase                                       | 67   |
| 11 | gi_302386734 | gi_374315727 | YP 003822556.1 polar amino acid ABC transporter inner membrane subunit           | 71.9 |
| 11 | gi_302386735 | gi_374315728 | YP 003822557.1 family 3 extracellular solute-binding protein                     | 61.5 |
| 12 | gi_302387418 | gi_374315759 | YP 003823240.1 malate/L-lactate dehydrogenase                                    | 62.8 |
| 12 | gi_302387311 | gi_374315763 | YP 003823133.1 ABC transporter                                                   | 66.1 |
| 12 | gi_302387310 | gi_374315764 | YP 003823132.1 ABC transporter                                                   | 59.1 |
| 12 | gi_302387309 | gi_374315765 | YP 003823131.1 inner-membrane translocator                                       | 59.7 |
| 12 | gi_302387308 | gi_374315766 | YP 003823130.1 inner-membrane translocator                                       | 78.5 |
| 12 | gi_302387307 | gi_374315767 | YP 003823129.1 extracellular ligand-binding receptor                             | 73.8 |
| 12 | gi_302385731 | gi_374315788 | YP 003821553.1 sodium ion-translocating decarboxylase subunit                    | 60.9 |

|    |              |              |                                                                                  |      |
|----|--------------|--------------|----------------------------------------------------------------------------------|------|
|    |              |              | beta                                                                             |      |
| 12 | gi_302384784 | gi_374315790 | YP 003820606.1 dCMP deaminase                                                    | 62.3 |
| 13 | gi_302384774 | gi_374315940 | YP 003820596.1 xylose isomerase domain-containing protein TIM barrel             | 65.6 |
| 13 | gi_302384775 | gi_374315941 | YP 003820597.1 binding-protein-dependent transport system inner membrane protein | 72.4 |
| 13 | gi_302384776 | gi_374315942 | YP 003820598.1 binding-protein-dependent transport system inner membrane protein | 67.6 |
| 13 | gi_302384777 | gi_374315943 | YP 003820599.1 extracellular solute-binding protein                              | 68.6 |
| 14 | gi_302384523 | gi_374316702 | YP 003820345.1 ABC transporter                                                   | 67.1 |
| 14 | gi_302384524 | gi_374316703 | YP 003820346.1 inner-membrane translocator                                       | 67.2 |
| 14 | gi_302384525 | gi_374316704 | YP 003820347.1 LacI family transcriptional regulator                             | 72.6 |
| 15 | gi_302385244 | gi_374317120 | YP 003821066.1 extracellular solute-binding protein                              | 62.7 |
| 15 | gi_302385245 | gi_374317121 | YP 003821067.1 tripartite AtP-independent periplasmic transporter subunit DctQ   | 68.2 |
| 15 | gi_302385246 | gi_374317122 | YP 003821068.1 TRAP dicarboxylate transporter subunit DctM                       | 81.9 |
| 16 | gi_302386148 | gi_374317162 | YP 003821970.1 phage major capsid protein, HK97 family                           | 62.8 |
| 16 | gi_302386147 | gi_374317163 | YP 003821969.1 peptidase S14 ClpP                                                | 53.7 |
| 16 | gi_302386146 | gi_374317164 | YP 003821968.1 phage portal protein, HK97 family                                 | 66.2 |

#### Deferribacter desulfuricans SSM1 and Geobacter uraniireducens Rf4

| Synthetic Region | Gi 1         | Gi 2         | Annotation                                         | a.a. identity (%) |
|------------------|--------------|--------------|----------------------------------------------------|-------------------|
| 1                | gi_291280213 | gi_148265082 | YP 003497048.1 acetyl-CoA C-acetyltransferase      | 66.8              |
| 1                | gi_291280212 | gi_148265081 | YP 003497047.1 3-hydroxybutyryl-CoA dehydrogenase  | 65.3              |
| 1                | gi_291280211 | gi_148265080 | YP 003497046.1 3-hydroxybutyryl-CoA dehydratase    | 62.8              |
| 1                | gi_291280210 | gi_148265079 | YP 003497045.1 butyryl-CoA dehydrogenase           | 74.3              |
| 1                | gi_291280209 | gi_148263663 | YP 003497044.1 iron-sulfur cluster-binding protein | 65.8              |

|   |              |              |                                                                    |      |
|---|--------------|--------------|--------------------------------------------------------------------|------|
| 1 | gi_291280208 | gi_148265077 | YP 003497043.1 electron transfer flavoprotein subunit beta         | 69.3 |
| 1 | gi_291280207 | gi_148265076 | YP 003497042.1 electron transfer flavoprotein subunit alpha        | 72.5 |
| 1 | gi_291280192 | gi_148265419 | YP 003497027.1 acetate kinase                                      | 70.2 |
| 2 | gi_291279999 | gi_148264216 | YP 003496834.1 cytochrome bd oxidase subunit II                    | 65.7 |
| 2 | gi_291279998 | gi_148264217 | YP 003496833.1 cytochrome bd oxidase subunit I                     | 69.8 |
| 3 | gi_291279856 | gi_148265390 | YP 003496691.1 nitrogen regulatory protein P-II                    | 72.3 |
| 3 | gi_291279855 | gi_148264278 | YP 003496690.1 glutamine synthetase type I                         | 70.4 |
| 4 | gi_291279849 | gi_148263653 | YP 003496684.1 long-chain fatty-acid-CoA ligase                    | 65.4 |
| 4 | gi_291279848 | gi_148263654 | YP 003496683.1 3-hydroxyacyl-CoA dehydrogenase/enoyl-CoA hydratase | 66.8 |
| 4 | gi_291279847 | gi_148263655 | YP 003496682.1 3-ketoacyl-CoA thiolase                             | 74.6 |
| 4 | gi_291279846 | gi_148263656 | YP 003496681.1 acyl-CoA dehydrogenase                              | 76.2 |
| 5 | gi_291279843 | gi_148264890 | YP 003496678.1 HNH endonuclease                                    | 69.2 |
| 5 | gi_291279842 | gi_148262944 | YP 003496677.1 phosphoenolpyruvate carboxykinase (ATP)             | 62   |
| 6 | gi_291279569 | gi_148264363 | YP 003496404.1 2-isopropylmalate synthase                          | 64.5 |
| 6 | gi_291279568 | gi_148264364 | YP 003496403.1 aspartate kinase monofunctional class               | 63.8 |
| 7 | gi_291279489 | gi_148264234 | YP 003496324.1 riboflavin synthase beta chain                      | 61.8 |
| 7 | gi_291279488 | gi_148264235 | YP 003496323.1 riboflavin biosynthesis bifunctional protein RibBA  | 67.6 |
| 8 | gi_291279312 | gi_148264247 | YP 003496147.1 malate dehydrogenase                                | 75   |
| 8 | gi_291279311 | gi_148264248 | YP 003496146.1 isocitrate dehydrogenase NADP-dependent             | 67.2 |
| 8 | gi_291279310 | gi_148263996 | YP 003496145.1 aconitate hydratase                                 | 71.6 |
| 9 | gi_291279213 | gi_148263639 | YP 003496048.1 citrate synthase                                    | 65.3 |

|    |              |              |                                                   |      |
|----|--------------|--------------|---------------------------------------------------|------|
| 9  | gi_291279211 | gi_148262430 | YP 003496046.1 porphobilinogen synthase           | 70.8 |
| 10 | gi_291278972 | gi_148263636 | YP 003495807.1 acyl-CoA synthase                  | 61.7 |
| 10 | gi_291278971 | gi_148266340 | YP 003495806.1 pyruvate:ferredoxin oxidoreductase | 66.5 |
| 11 | gi_291278510 | gi_148262626 | YP 003495345.1 Ni-Fe hydrogenase small subunit    | 66.9 |
| 11 | gi_291278509 | gi_148262625 | YP 003495344.1 Ni-Fe hydrogenase large subunit    | 73.4 |

**Listeria ivanovii PAM 55 and Sebaldella termitidis ATCC 33386**

| Synthetic Region | Gi 1         | Gi 2         | Annotation                                                                 | a.a. identity (%) |
|------------------|--------------|--------------|----------------------------------------------------------------------------|-------------------|
| 1                | gi_347547968 | gi_269118910 | YP 004854296.1 putative NADP-specific glutamate dehydrogenase              | 65.1              |
| 1                | gi_347549798 | gi_269118929 | YP 004856126.1 putative phosphate ABC transporter ATP binding protein      | 64                |
| 2                | gi_347548523 | gi_269119662 | YP 004854851.1 putative PduU protein                                       | 60.5              |
| 2                | gi_347548524 | gi_269119663 | YP 004854852.1 putative PduV protein                                       | 44.1              |
| 2                | gi_347548529 | gi_269119665 | YP 004854857.1 putative propanediol utilization protein PduA               | 76.5              |
| 2                | gi_347548530 | gi_269119652 | YP 004854858.1 putative propanediol utilization protein PduB               | 75.9              |
| 2                | gi_347548531 | gi_269119653 | YP 004854859.1 putative propanediol dehydratase subunit alpha              | 76.7              |
| 2                | gi_347548532 | gi_269119654 | YP 004854860.1 putative diol dehydrase subunit gamma                       | 58.5              |
| 2                | gi_347548533 | gi_269119655 | YP 004854861.1 putative diol dehydrase subunit gamma PddC                  | 54.7              |
| 2                | gi_347548534 | gi_269119656 | YP 004854862.1 putative diol dehydratase-reactivating factor large subunit | 67.3              |
| 2                | gi_347548535 | gi_269119657 | YP 004854863.1 putative diol dehydratase-reactivating factor small chain   | 41.7              |
| 2                | gi_347548537 | gi_269119665 | YP 004854865.1 putative carboxysome structural protein                     | 82.8              |
| 2                | gi_347548543 | gi_269119659 | YP 004854871.1 putative ethanolamine utilization protein EutE              | 55.4              |
| 2                | gi_347548556 | gi_269119660 | YP 004854884.1 putative carboxysome structural protein                     | 56.6              |
| 2                | gi_347548557 | gi_269119666 | YP 004854885.1 putative acetaldehyde dehydrogenase / alcohol dehydrogenase | 60.7              |
| 2                | gi_347548558 | gi_269119661 | YP 004854886.1 putative carboxysome structural protein                     | 85.7              |



|   |              |              |                                                                        |      |
|---|--------------|--------------|------------------------------------------------------------------------|------|
| 2 | gi_347548560 | gi_269119668 | YP 004854888.1 putative PduL protein                                   | 51.5 |
| 2 | gi_347548562 | gi_269119670 | YP 004854890.1 putative carbon dioxide concentrating mechanism protein | 62.8 |
| 3 | gi_347547746 | gi_269121938 | YP 004854074.1 putative phospho-beta-glucosidase                       | 67.2 |
| 3 | gi_347547927 | gi_269121939 | YP 004854255.1 putative 6-phospho-beta-glucosidase                     | 61.1 |
| 3 | gi_347547940 | gi_269121939 | YP 004854268.1 putative 6-phospho-beta-glucosidase                     | 67.3 |
| 3 | gi_347550094 | gi_269121938 | YP 004856422.1 putative beta-glucosidase                               | 68.4 |
| 4 | gi_347547782 | gi_269121842 | YP 004854110.1 putative oxidoreductase                                 | 71.3 |
| 4 | gi_347549403 | gi_269121832 | YP 004855731.1 putative oxidoreductase                                 | 70.9 |
| 5 | gi_347547708 | gi_269121624 | YP 004854036.1 DeoR family transcriptional regulator                   | 69   |
| 5 | gi_347547709 | gi_269121623 | YP 004854037.1 putative N-acetylmannosamine-6-phosphate epimerase      | 80.7 |
| 5 | gi_347547710 | gi_269121621 | YP 004854038.1 putative mannose-specific PTS system enzyme IIB         | 64.7 |
| 5 | gi_347547711 | gi_269121620 | YP 004854039.1 putative mannose-specific PTS system enzyme IIC         | 84.3 |
| 5 | gi_347547712 | gi_269121619 | YP 004854040.1 putative mannose-specific PTS system enzyme IID         | 78.3 |
| 5 | gi_347547713 | gi_269121618 | YP 004854041.1 putative mannose-specific PTS system enzyme IIA         | 61.1 |
| 6 | gi_347549949 | gi_269121095 | YP 004856277.1 putative phosphotriesterase                             | 70.2 |
| 6 | gi_347549950 | gi_269121096 | YP 004856278.1 putative PTS enzyme IIC component                       | 67.9 |
| 7 | gi_347548252 | gi_269120483 | YP 004854580.1 putative amino acid ABC transporter ATP-binding protein | 66.1 |
| 7 | gi_347549641 | gi_269120483 | YP 004855969.1 putative amino acid ABC transporter ATP binding protein | 61.2 |
| 8 | gi_347550146 | gi_269120141 | YP 004856474.1 hypothetical protein                                    | 61.7 |

|    |              |              |                                                                            |      |
|----|--------------|--------------|----------------------------------------------------------------------------|------|
| 8  | gi_347550147 | gi_269120140 | YP 004856475.1 putative alcohol dehydrogenase                              | 74.9 |
| 8  | gi_347550148 | gi_269120139 | YP 004856476.1 putative sugar ABC transporter permease                     | 69.6 |
| 8  | gi_347550149 | gi_269120138 | YP 004856477.1 putative sugar ABC transporter permease                     | 65.1 |
| 9  | gi_347548281 | gi_269119824 | YP 004854609.1 putative PTS system, beta-glucoside enzyme IIB component    | 67.9 |
| 9  | gi_347548282 | gi_269119823 | YP 004854610.1 putative PTS system, Lichenan-specific enzyme IIC component | 71.8 |
| 9  | gi_347548284 | gi_269119821 | YP 004854612.1 putative oxidoreductase                                     | 62.3 |
| 10 | gi_347548555 | gi_269119678 | YP 004854883.1 putative carboxysome structural protein EutL                | 70   |
| 10 | gi_347548564 | gi_269119679 | YP 004854892.1 putative ethanolamine utilization protein EutH              | 73.8 |
| 11 | gi_347548553 | gi_269119676 | YP 004854881.1 eutB gene product                                           | 71.8 |
| 11 | gi_347548552 | gi_269119675 | YP 004854880.1 eutA gene product                                           | 51.1 |

---

**Table S9. The genomes used in the study and the fraction of their genes detected to be horizontally transferred from/to other phyla.** The data shown are based on the gene-based analysis (see main text for details), and the genomes are shown in order of increasing rate of HGT. The Table is provided as a separate Microsoft Excel file.

**Table S10. Description of the COG general functional categories.**Adapted from the COG website: <http://www.ncbi.nlm.nih.gov/COG/>

| <b>Category</b> | <b>Description</b>                                | <b>General category</b>             |
|-----------------|---------------------------------------------------|-------------------------------------|
| A               | RNA processing and modification                   | Information processes and signaling |
| B               | Chromatin Structure and dynamics                  | Information processes and signaling |
| C               | Energy production and conversion                  | Metabolism                          |
| D               | Cell cycle control and mitosis                    | Cellular processes and signaling    |
| E               | Amino Acid metabolism and transport               | Metabolism                          |
| F               | Nucleotide metabolism and transport               | Metabolism                          |
| G               | Carbohydrate metabolism and transport             | Metabolism                          |
| H               | Coenzyme metabolism                               | Metabolism                          |
| I               | Lipid metabolism                                  | Metabolism                          |
| J               | Translation                                       | Information processes and signaling |
| K               | Transcription                                     | Information processes and signaling |
| L               | Replication and repair                            | Information processes and signaling |
| M               | Cell wall/membrane/envelop biogenesis             | Cellular processes and signaling    |
| N               | Cell motility                                     | Cellular processes and signaling    |
| O               | Post-translational modification, protein turnover | Cellular processes and signaling    |
| P               | Inorganic ion transport and metabolism            | Metabolism                          |
| Q               | Secondary Structure                               | Metabolism                          |
| T               | Signal Transduction                               | Cellular processes and signaling    |
| U               | Intracellular trafficking and secretion           | Cellular processes and signaling    |
| Y               | Nuclear structure                                 | Cellular processes and signaling    |
| Z               | Cytoskeleton                                      | Cellular processes and signaling    |
| R               | General Functional Prediction only                | Poorly Characterized                |
| S               | Function Unknown                                  | Poorly Characterized                |

## REFERENCES

Benjamini Y, Hochberg Y (1995). Controlling the False Discovery Rate - a practical and powerful approach to multiple testing. *J Roy Stat Soc B Met* **57**: 289-300.

Caro-Quintero A, Ritalahti KM, Cusick KD, Loffler FE, Konstantinidis KT (2012). The chimeric genome of *Sphaerochaeta*: nonspiral spirochetes that break with the prevalent dogma in spirochete biology. *MBio* **3**.

Clauset A, Newman MEJ, Moore C (2004). Finding community structure in very large networks. *Phys Rev E* **70**.

Edgar RC (2010). Search and clustering orders of magnitude faster than BLAST. *Bioinformatics* **26**: 2460-2461.

Konstantinidis KT, Tiedje JM (2005). Genomic insights that advance the species definition for prokaryotes. *Proc Natl Acad Sci U S A* **102**: 2567-2572.

Newman MEJ, Girvan M (2004). Finding and evaluating community structure in networks. *Phys Rev E* **69**.

Shaffer JP (1995). Multiple Hypothesis-Testing. *Annu Rev Psychol* **46**: 561-584.

Smoot ME, Ono K, Ruscheinski J, Wang PL, Ideker T (2011). Cytoscape 2.8: new features for data integration and network visualization. *Bioinformatics* **27**: 431-432.

Su G, Kuchinsky A, Morris JH, States DJ, Meng F (2010). GLay: community structure analysis of biological networks. *Bioinformatics* **26**: 3135-3137.

Wolf YI, Koonin EV (2012). A tight link between orthologs and bidirectional best hits in bacterial and archaeal genomes. *Genome Biol Evol* **4**: 1286-1294.
